# Supplementary material for: Disentangling ERBB Signaling in Breast Cancer Subtypes—A Model-Based Analysis
Source: MDPI journal article supplement (doi:10.3390/cancers14102379), 2022-05-12
Supplement: s1 [file s1]

# Supplementary Materials: Disentangling ERBB Signaling in Breast Cancer Subtypes – a Model-Based Analysis

Svenja Kemmer, Mireia Berdiel-Acer, Eileen Reinz, Johanna Sonntag, Nooraldeen Tarade, Stephan Bernhardt, Mirjam Fehling-Kaschek, Max Hasmann, Ulrike Korf, Stefan Wiemann and Jens Timmer

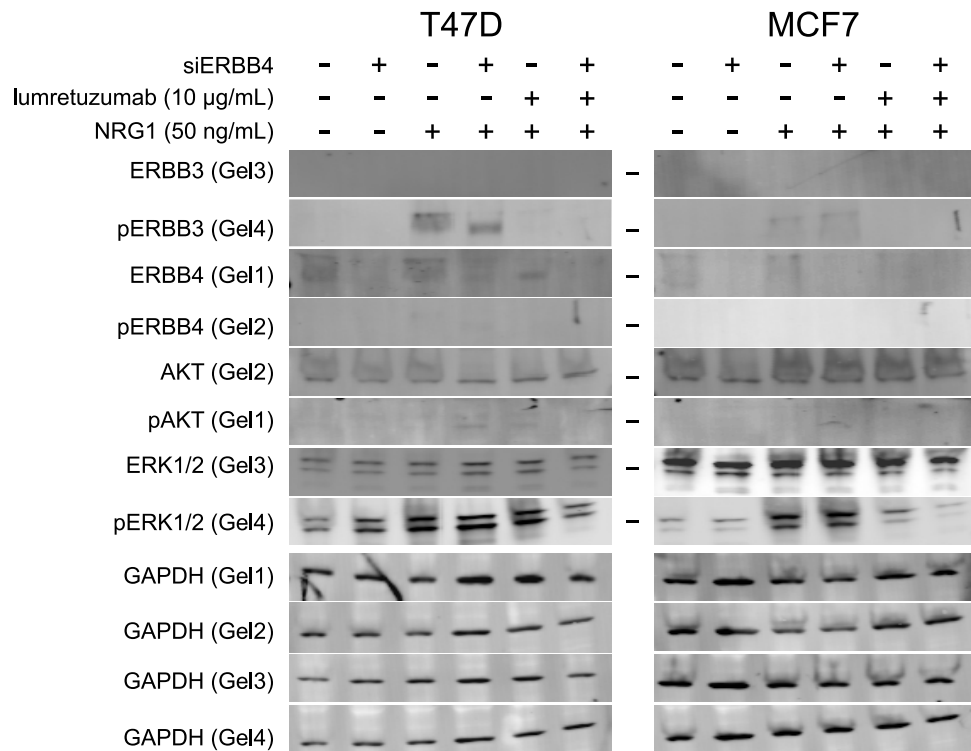

**Figure S1.** NRG1 induces signaling via ERBB3, and not ERBB4. *ERBB4* was (+) or not (-) knocked down in T47D and MCF7 cell lines, and alterations in total levels and phosphorylation of ERBB3 and ERBB4 receptors as well as of downstream targets AKT and ERK1/2 assessed. Cells were additionally treated with lumretuzumab and/or NRG1 to block and induce ERBB3 signaling, respectively.

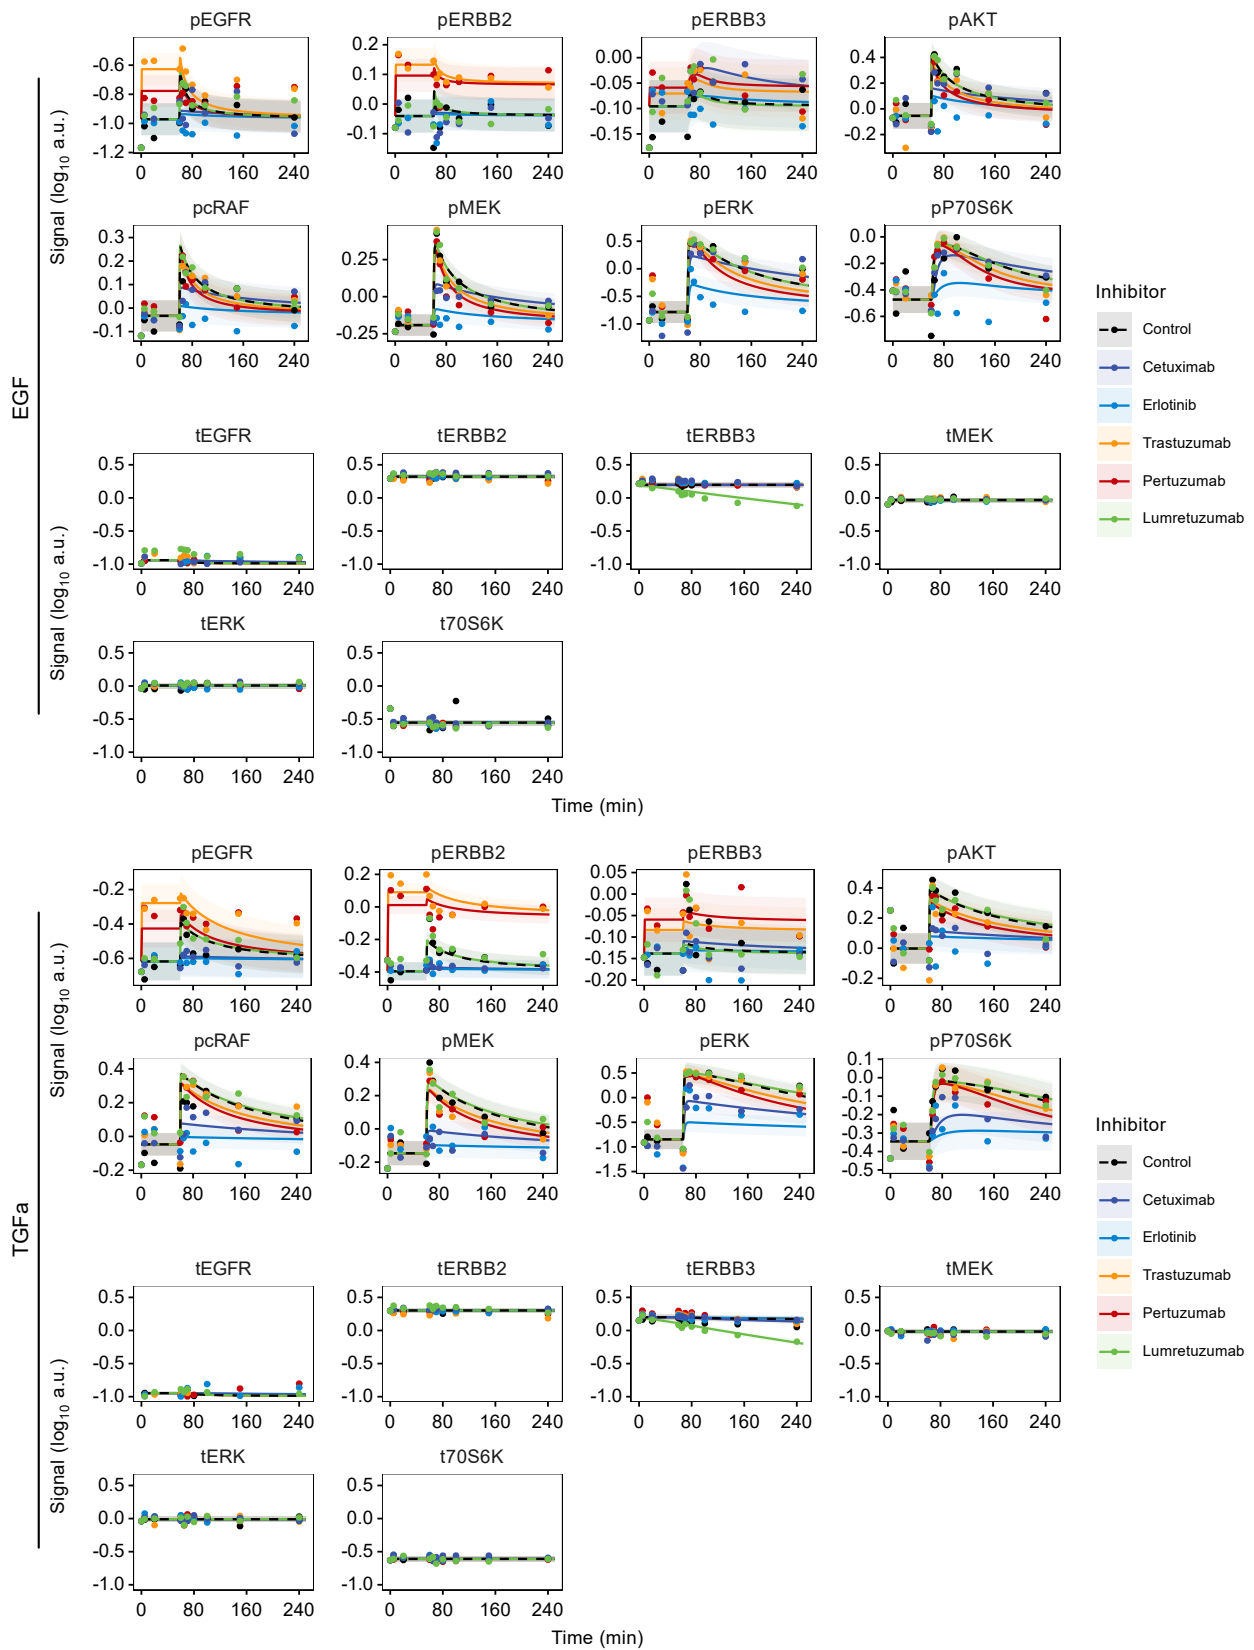

Figure S2. RPPA measurements and model fits of T47D cells.

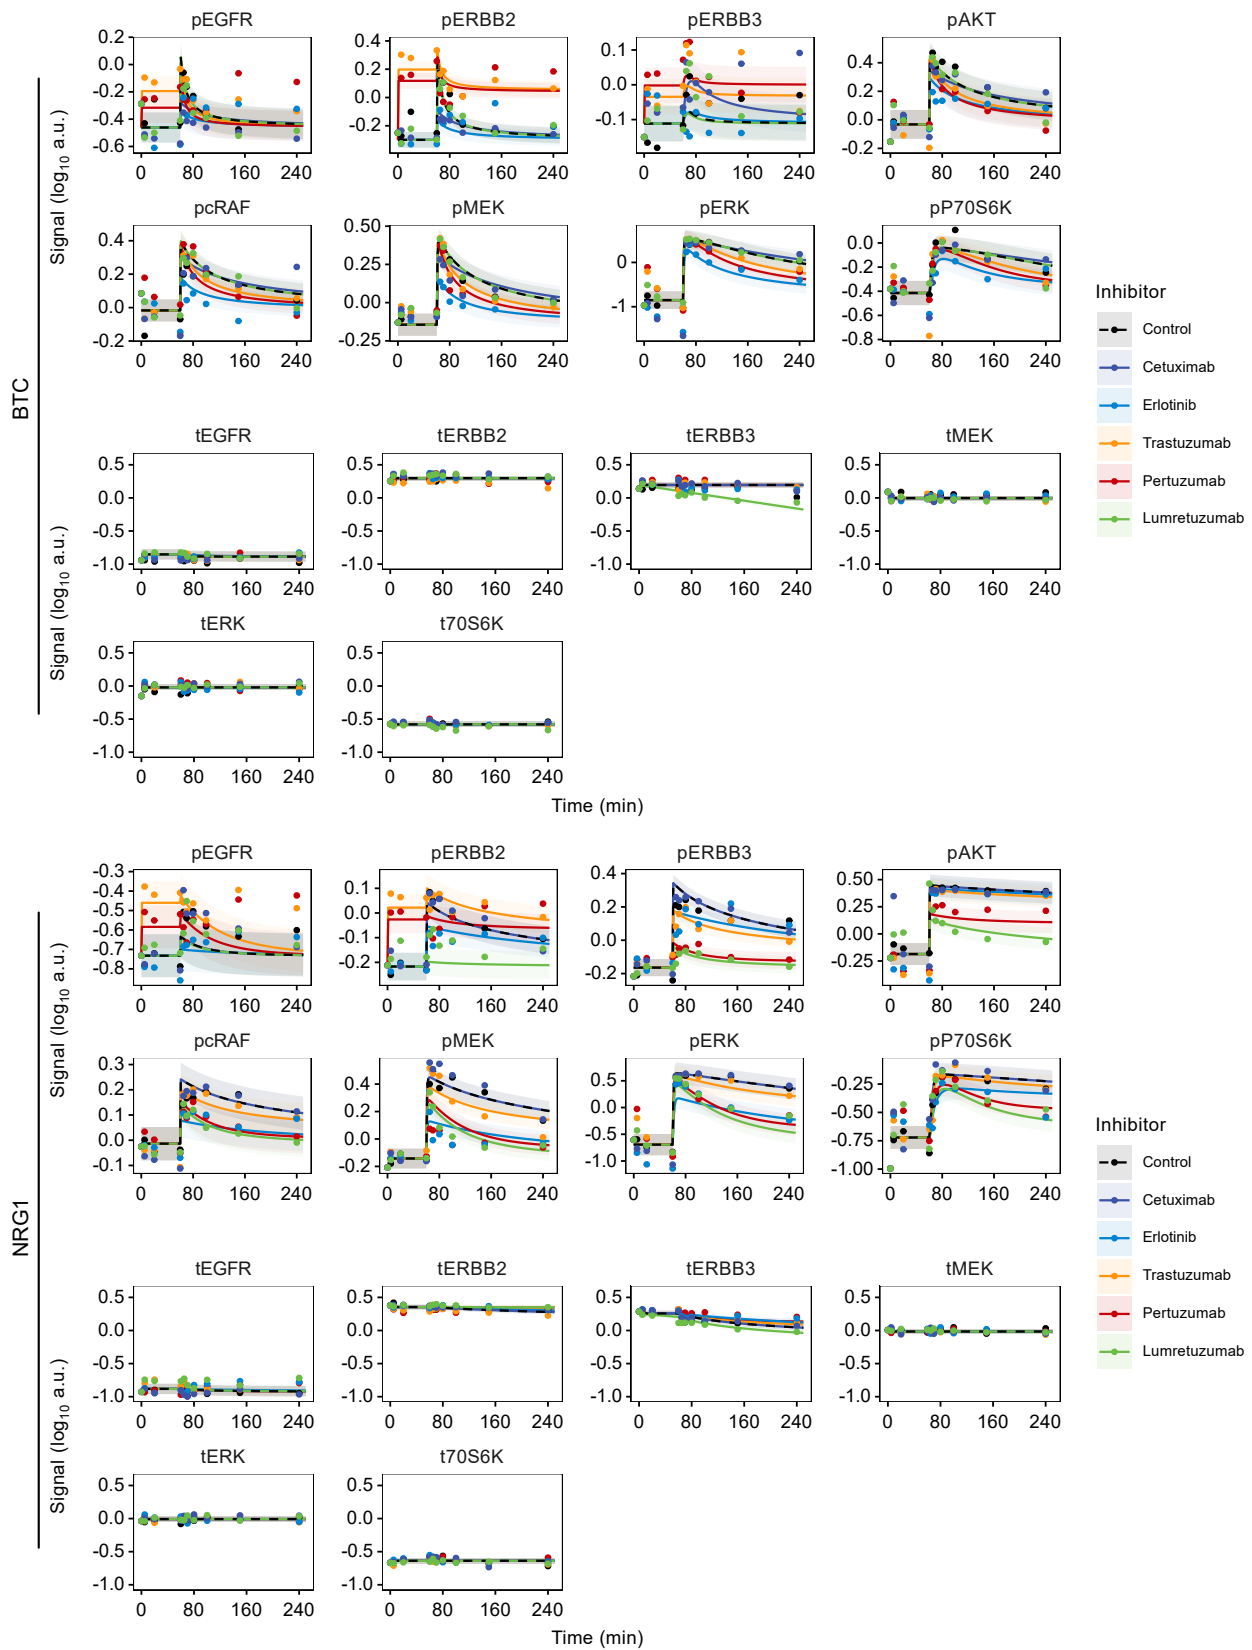

**Figure S2. (continued)** RPPA measurements and model fits of T47D cells. The cellular response to the different drugs is depicted under stimulation with EGF, TGfα, BTC or NRG1. Data represents the mean of biological replicates (n=3) and is displayed as dots. Trajectories of the model fit are indicated as solid lines.

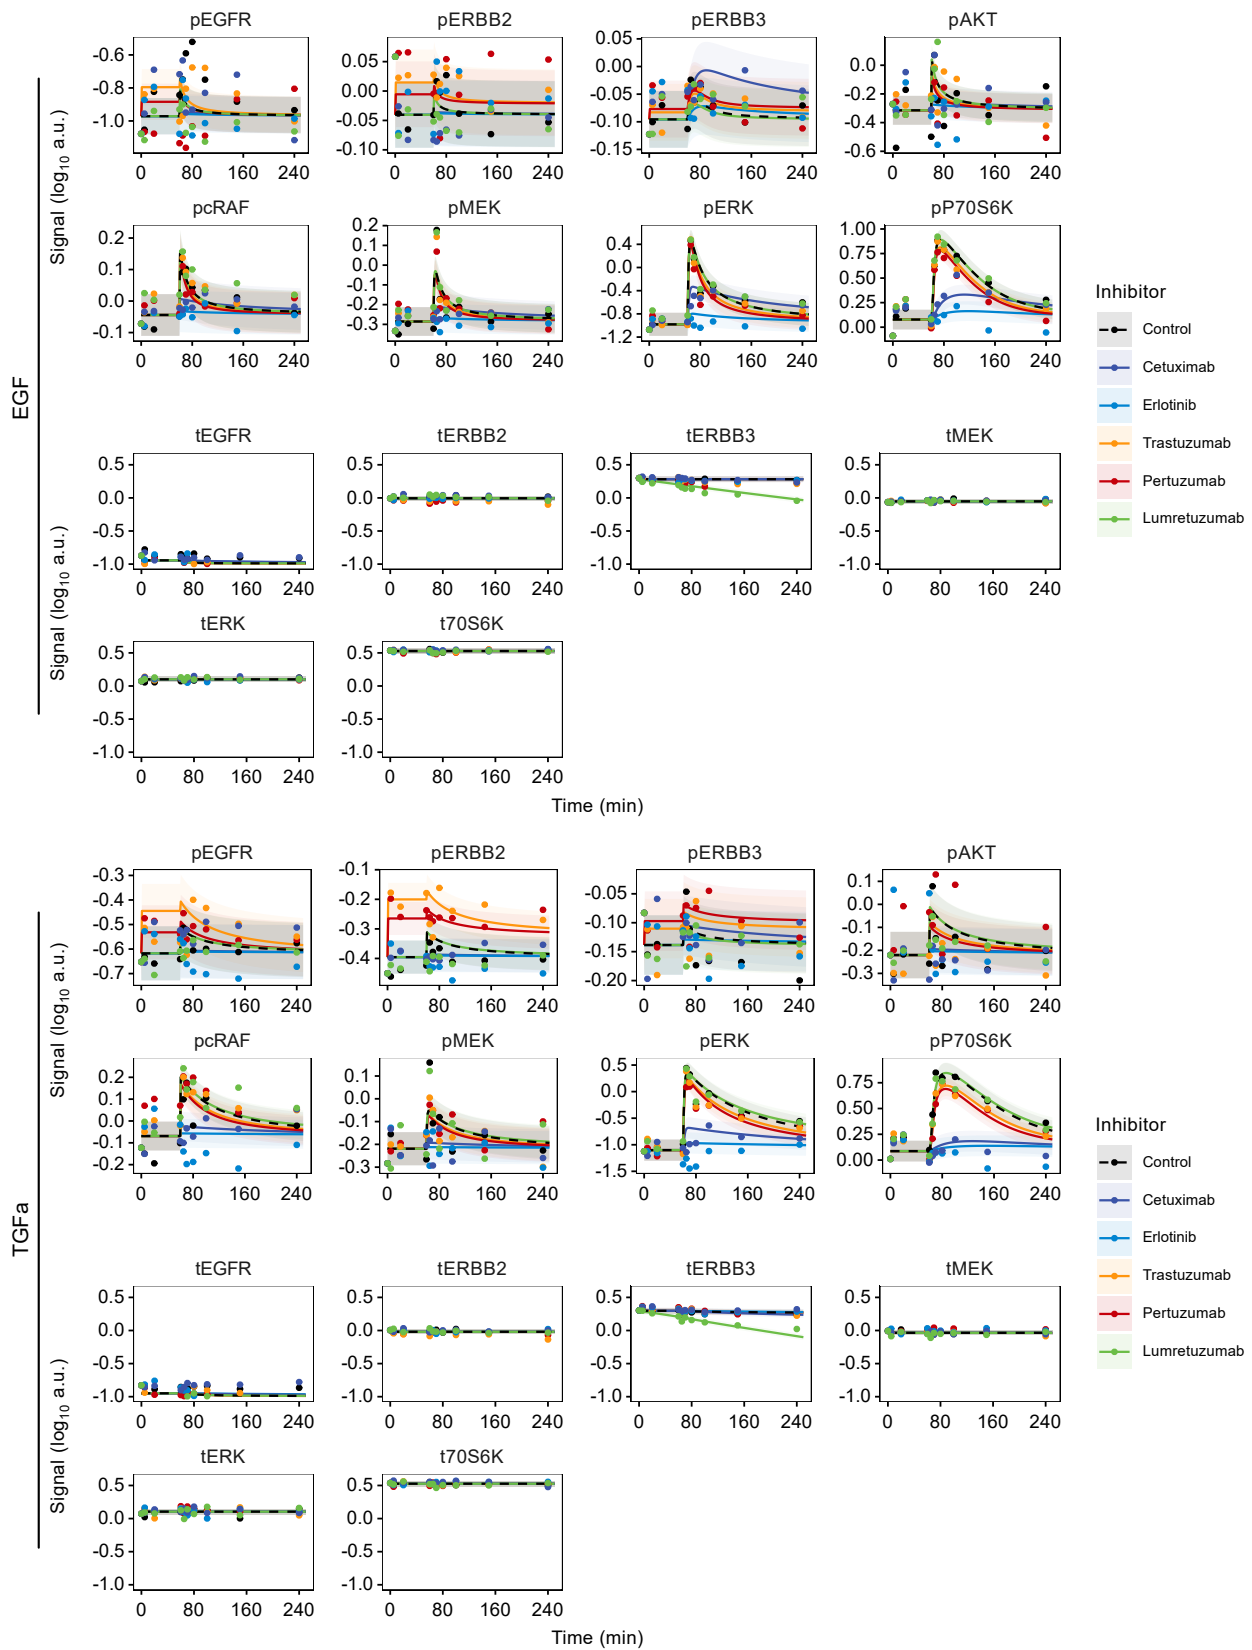

Figure S3. RPPA measurements and model fits of MCF7 cells.

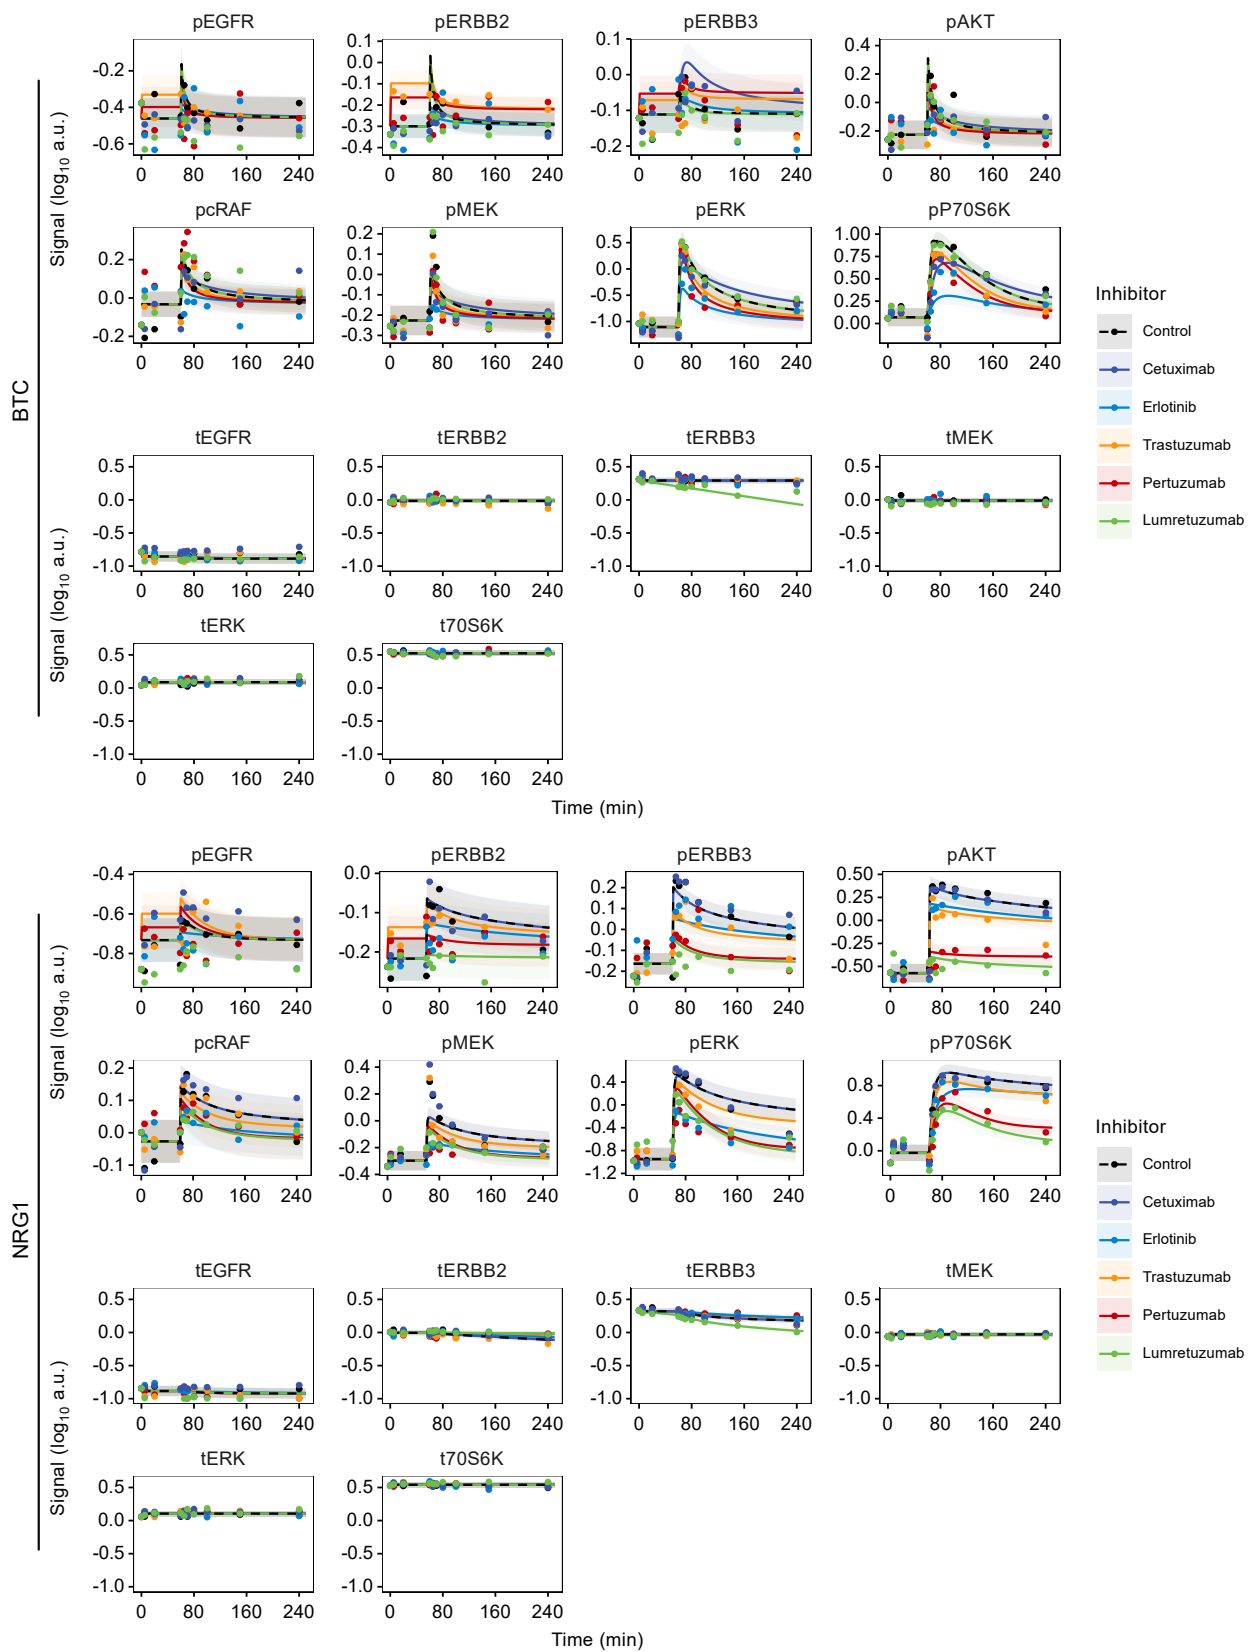

**Figure S3. (continued)** RPPA measurements and model fits of MCF7 cells. The cellular response to the different drugs is depicted under stimulation with EGF, TGfα, BTC or NRG1. Data represents the mean of biological replicates (n=3) and is displayed as dots. Trajectories of the model fit are indicated as solid lines.

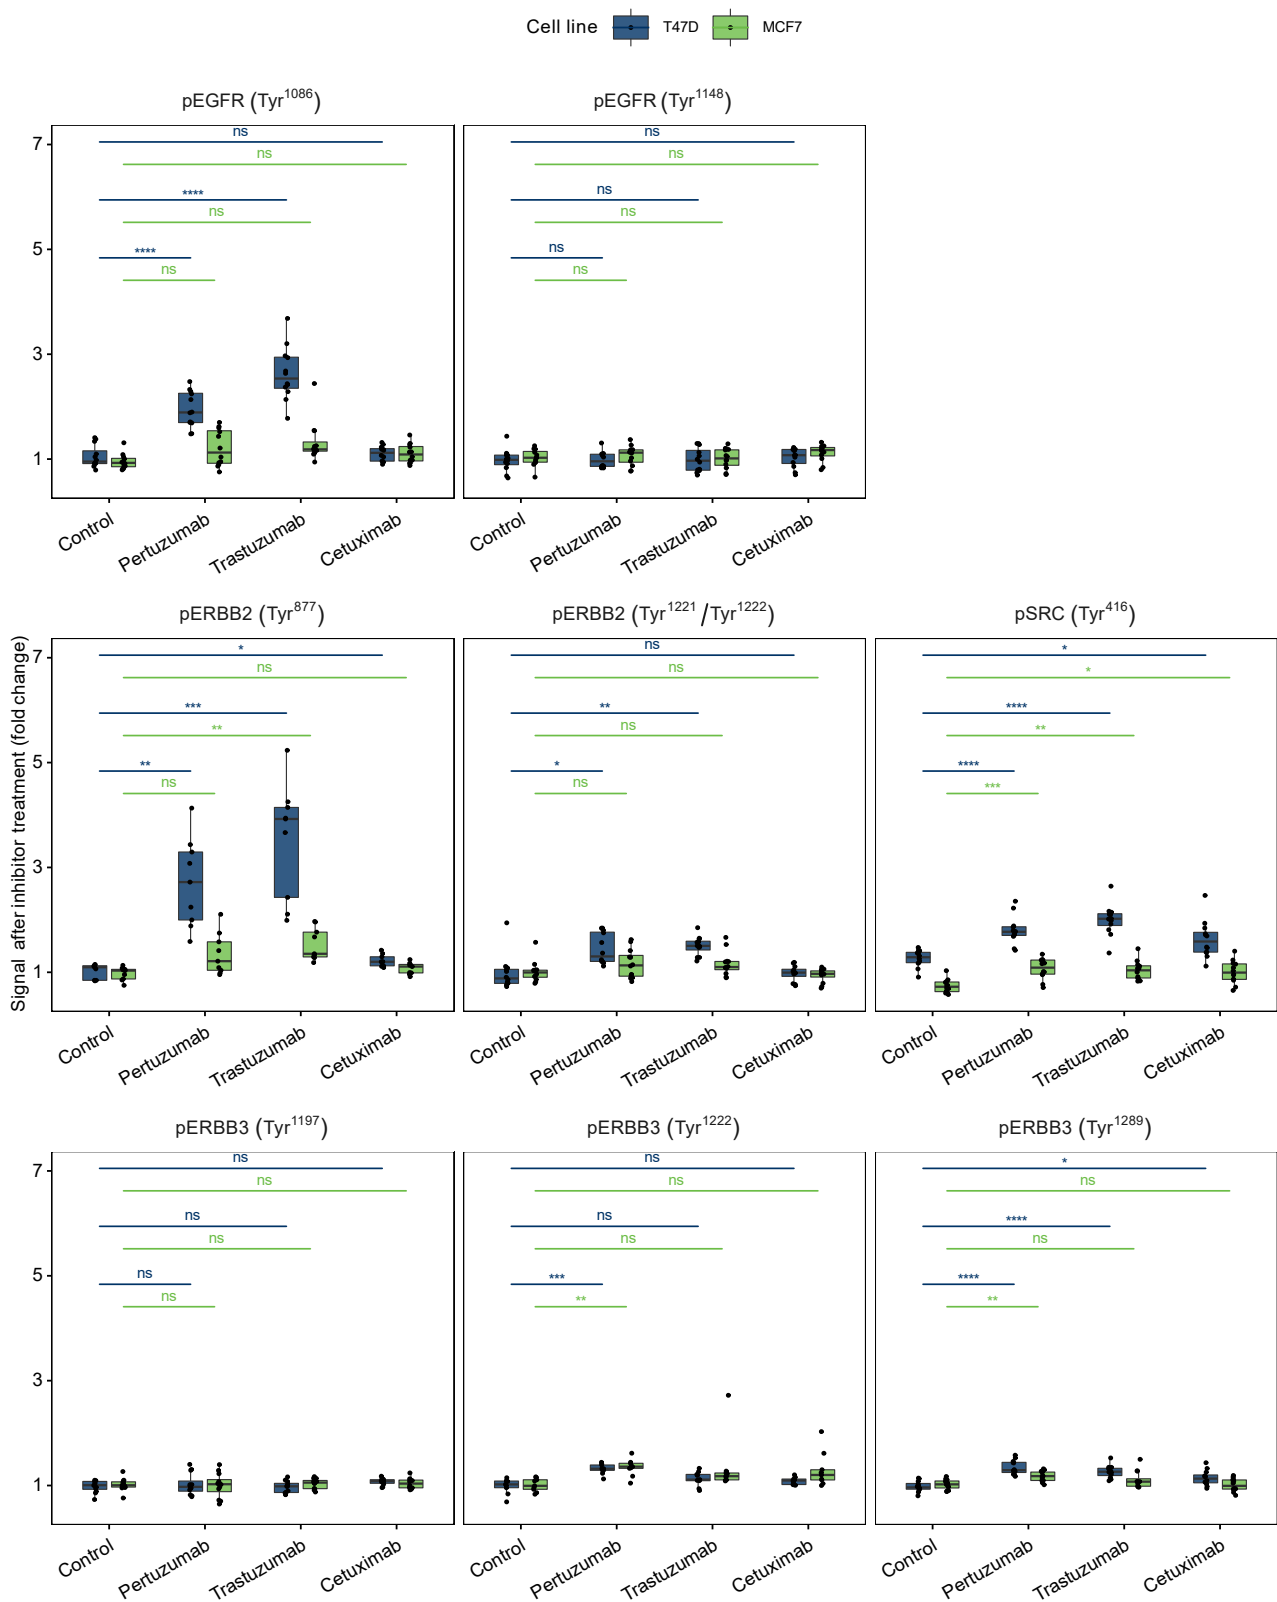

**Figure S4.** Antibody-induced phosphorylation of ERBB receptors in T47D and MCF7. The protein phosphorylation of EGFR, ERBB2 and ERBB3 and SRC at indicated sites are displayed for T47D and MCF7. Cells were treated with pertuzumab, trastuzumab or cetuximab or were left untreated for five minutes until the phosphorylation level was quantified by RPPA. Each condition is represented by 9-12 replicates. Significance levels indicate adjusted p values with the cutoffs: p-value.adj < 1 = n.s., < 0.05 = \*, < 0.01 = \*\*, < 0.001 = \*\*\*, < 1e-04 = \*\*\*\*.

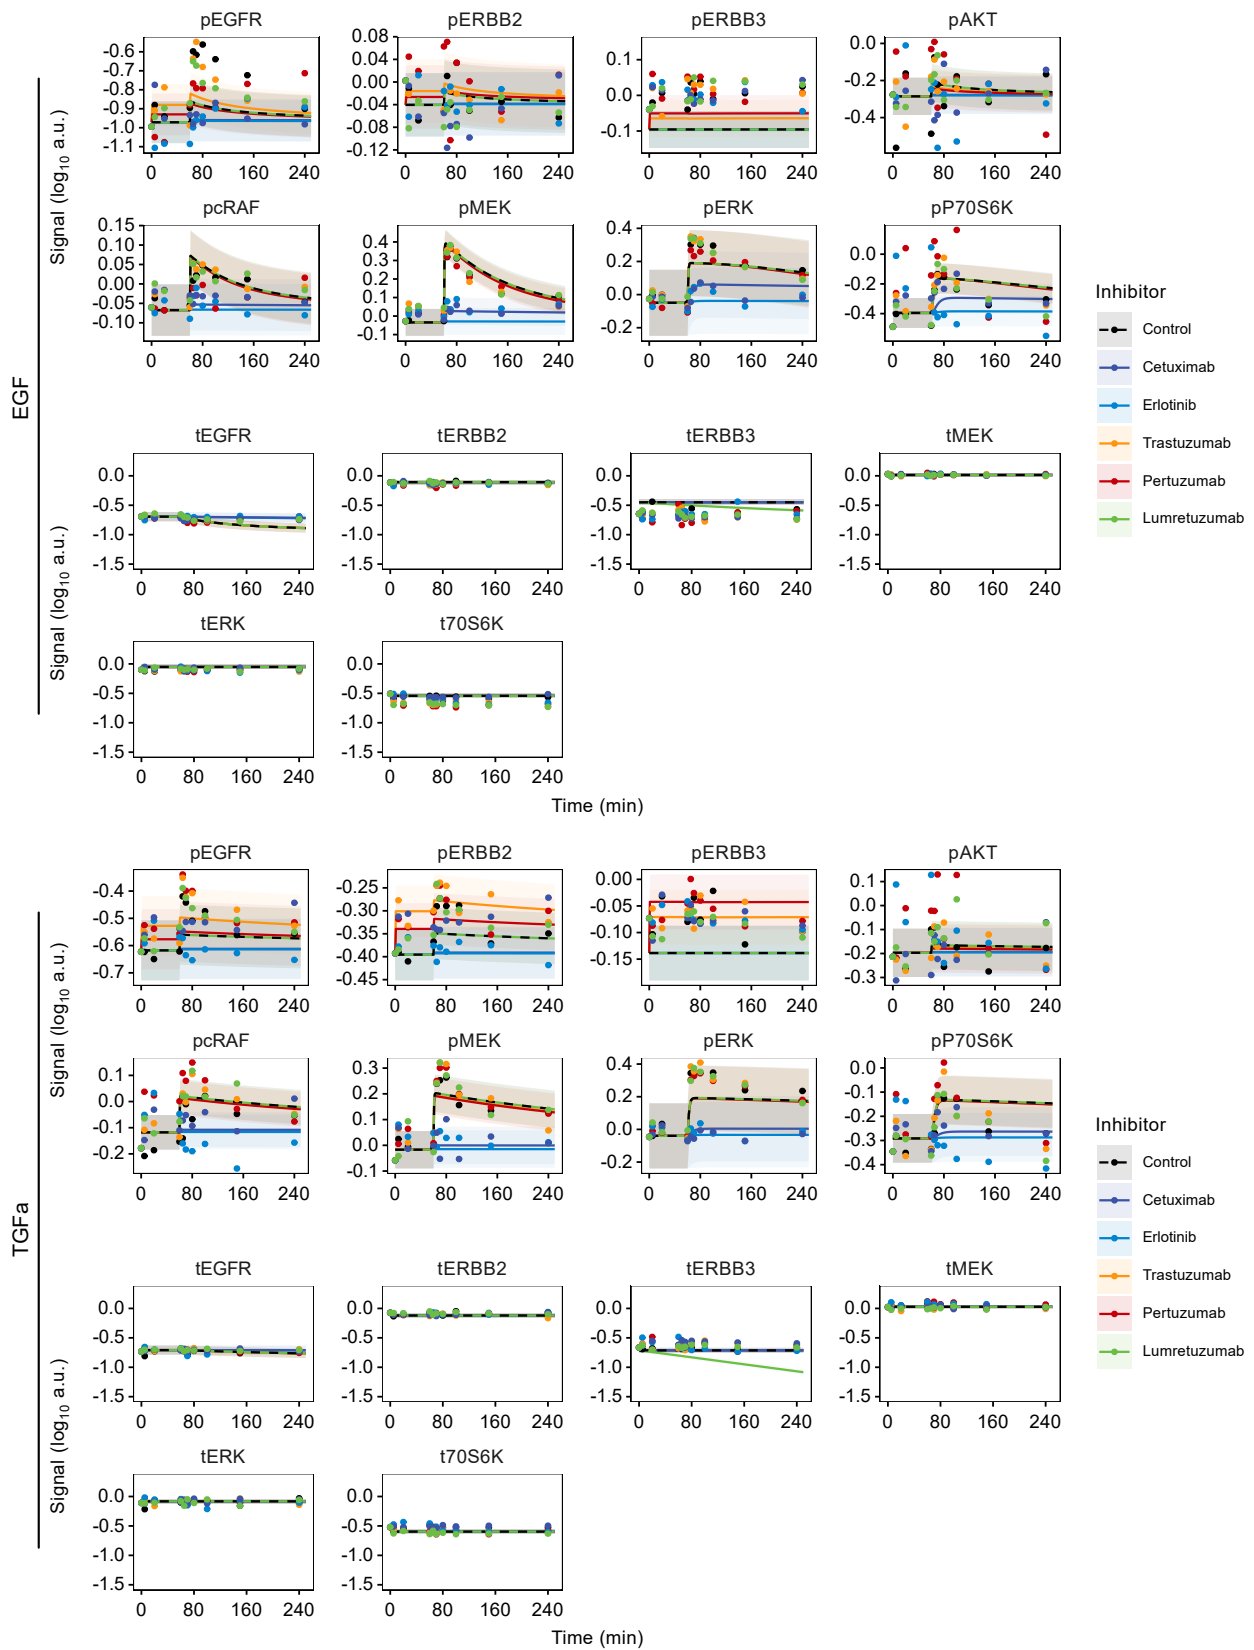

**Figure S5.** RPPA measurements and model fits of MDA-MB-231 cells.

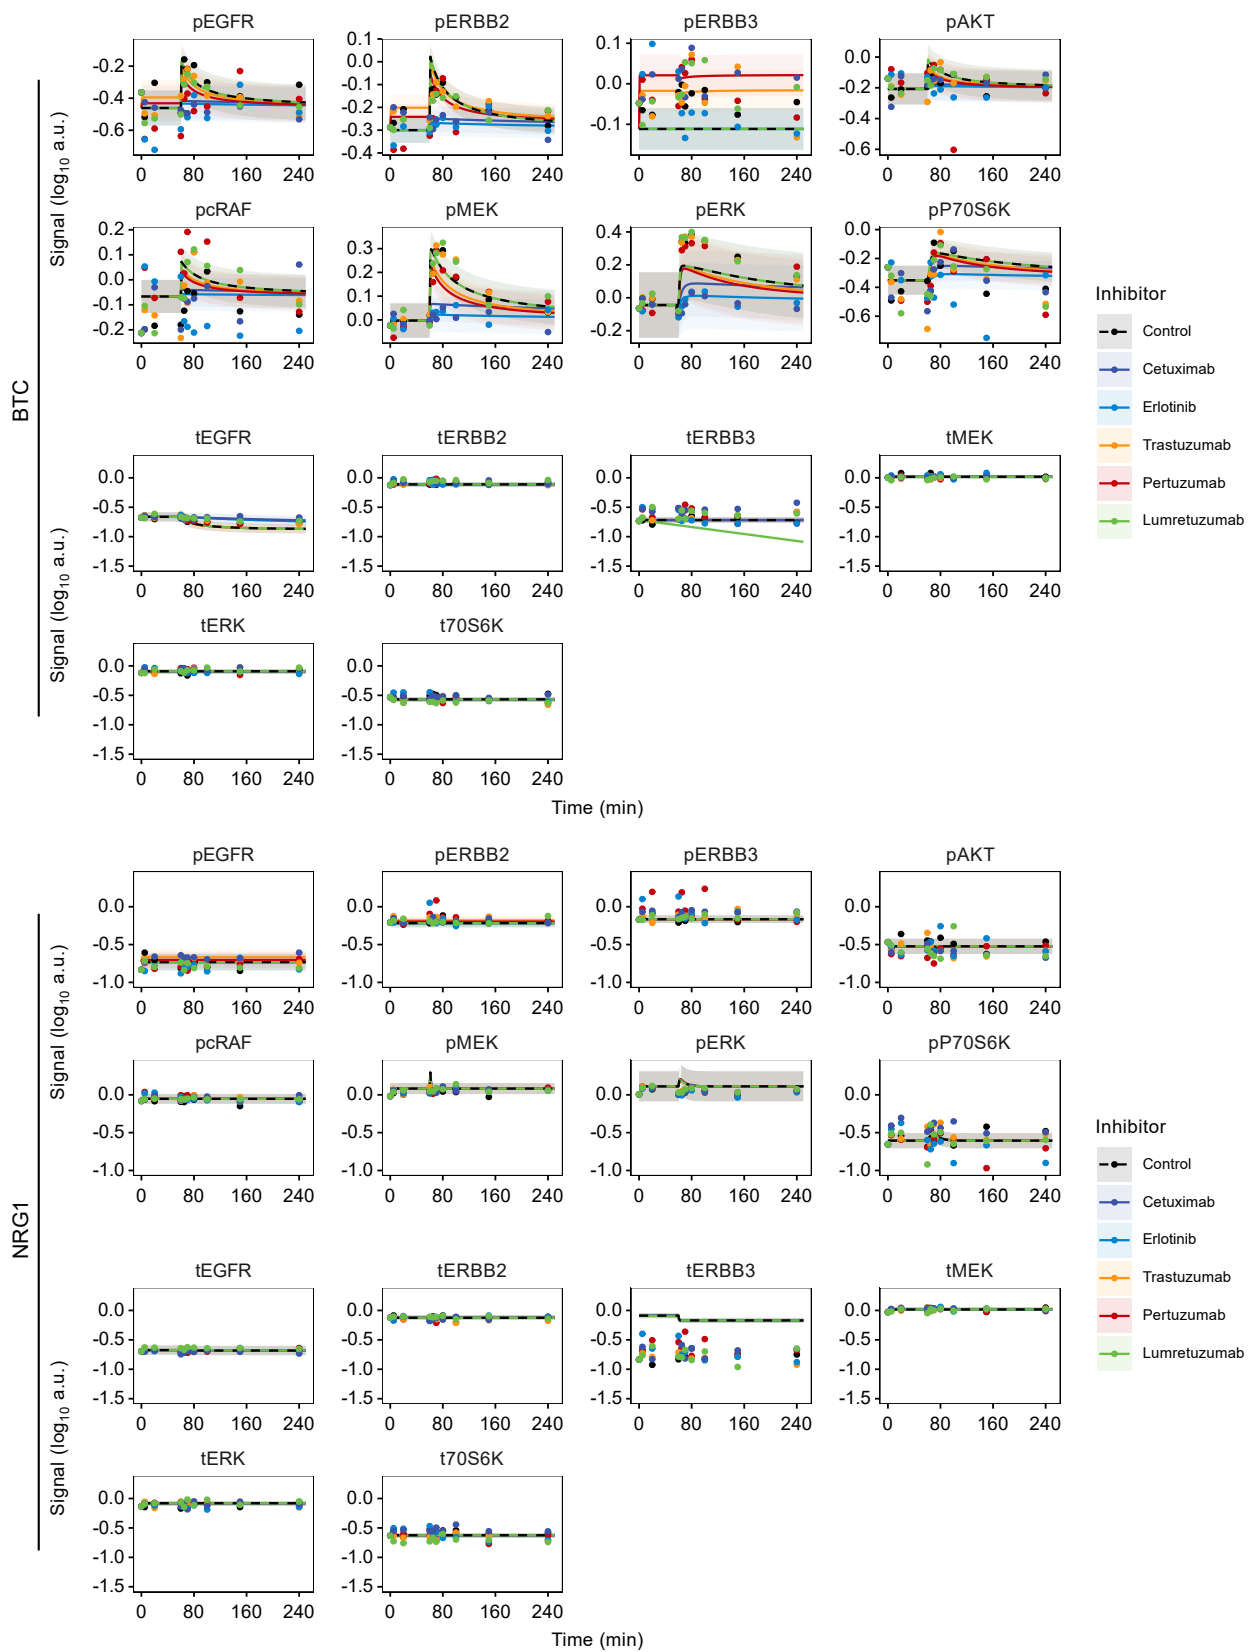

**Figure S5. (continued)** RPPA measurements and model fits of MDA-MB-231 cells. The cellular response to the different drugs is depicted under stimulation with EGF, TGF $\alpha$ , BTC or NRG1. Data represents the mean of biological replicates (n=3) and is displayed as dots. Trajectories of the model fit are indicated as solid lines.



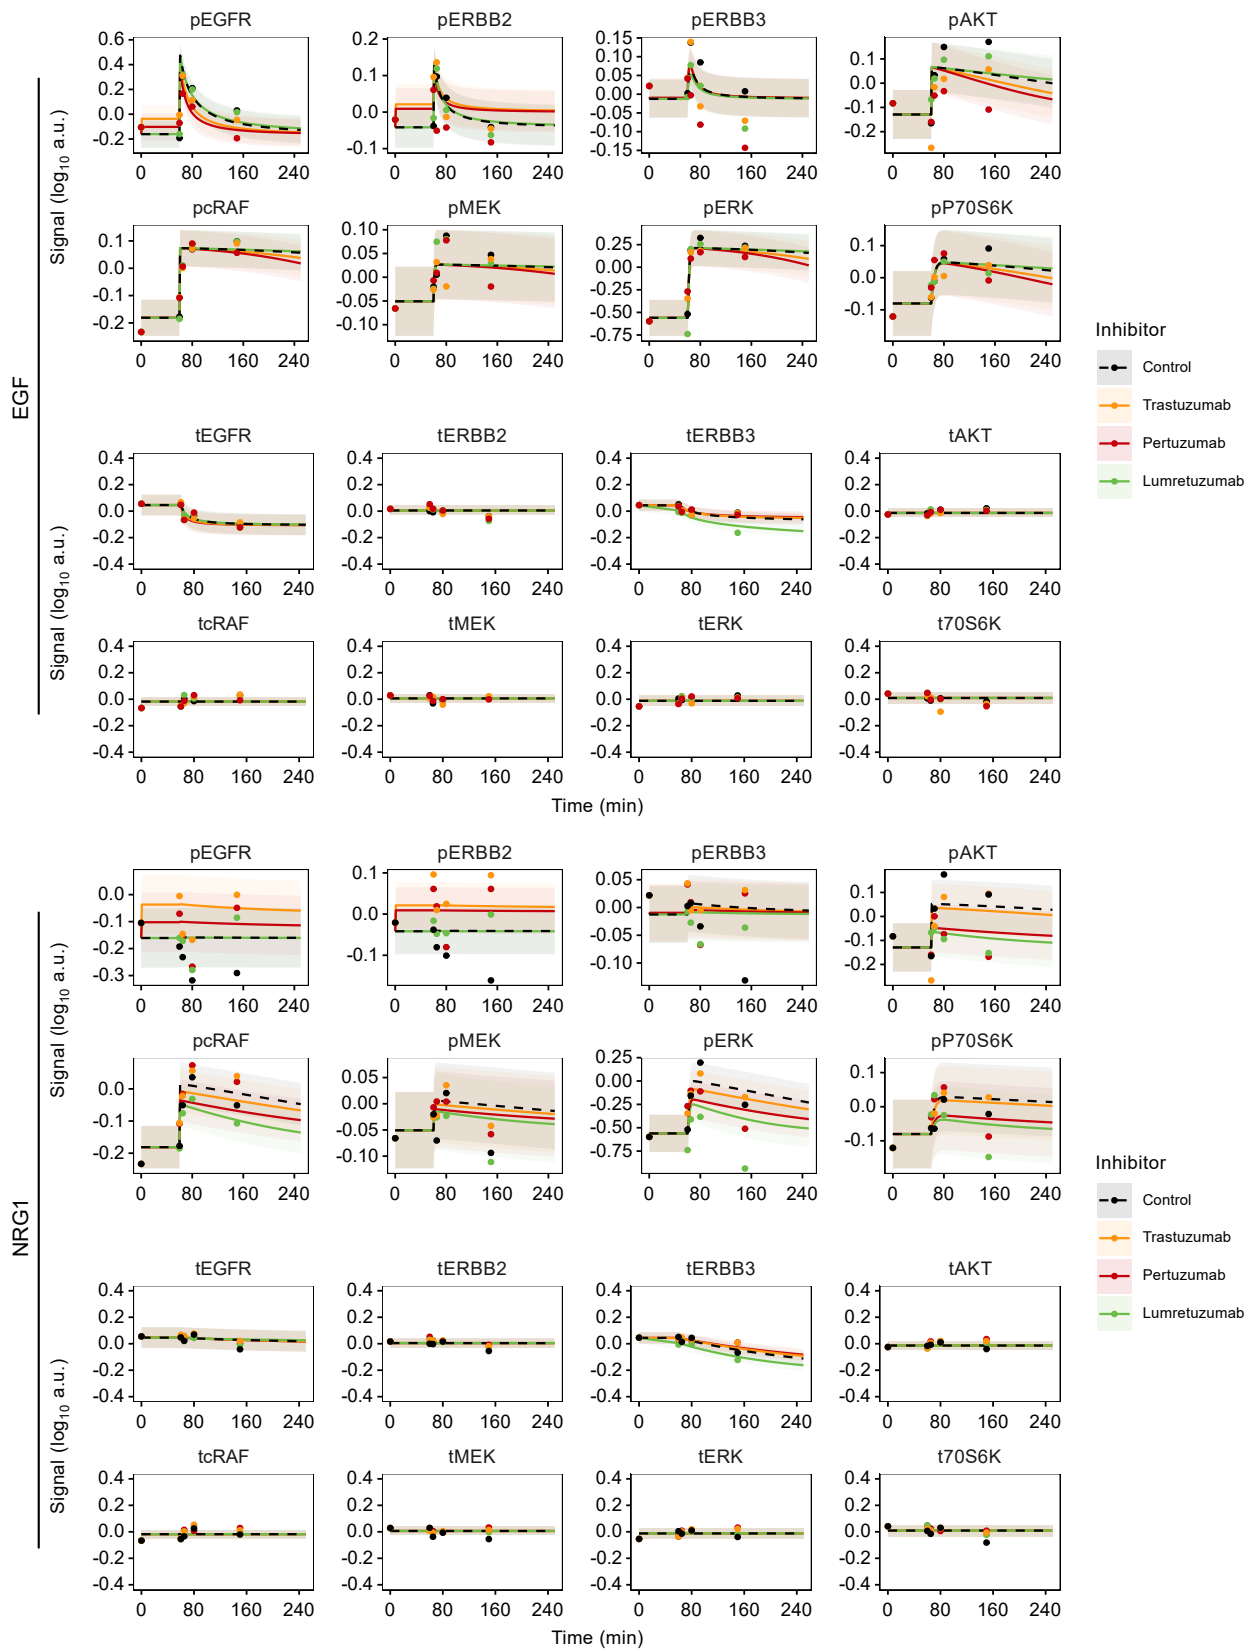

**Figure S6.** RPPA measurements and model fits of SKBR3 cells. The cellular response to the different drugs is depicted under stimulation with EGF or NRG1. Data represents the mean of biological replicates ( $n=3$ ) and is displayed as dots. Trajectories of the model fit are indicated as solid lines.

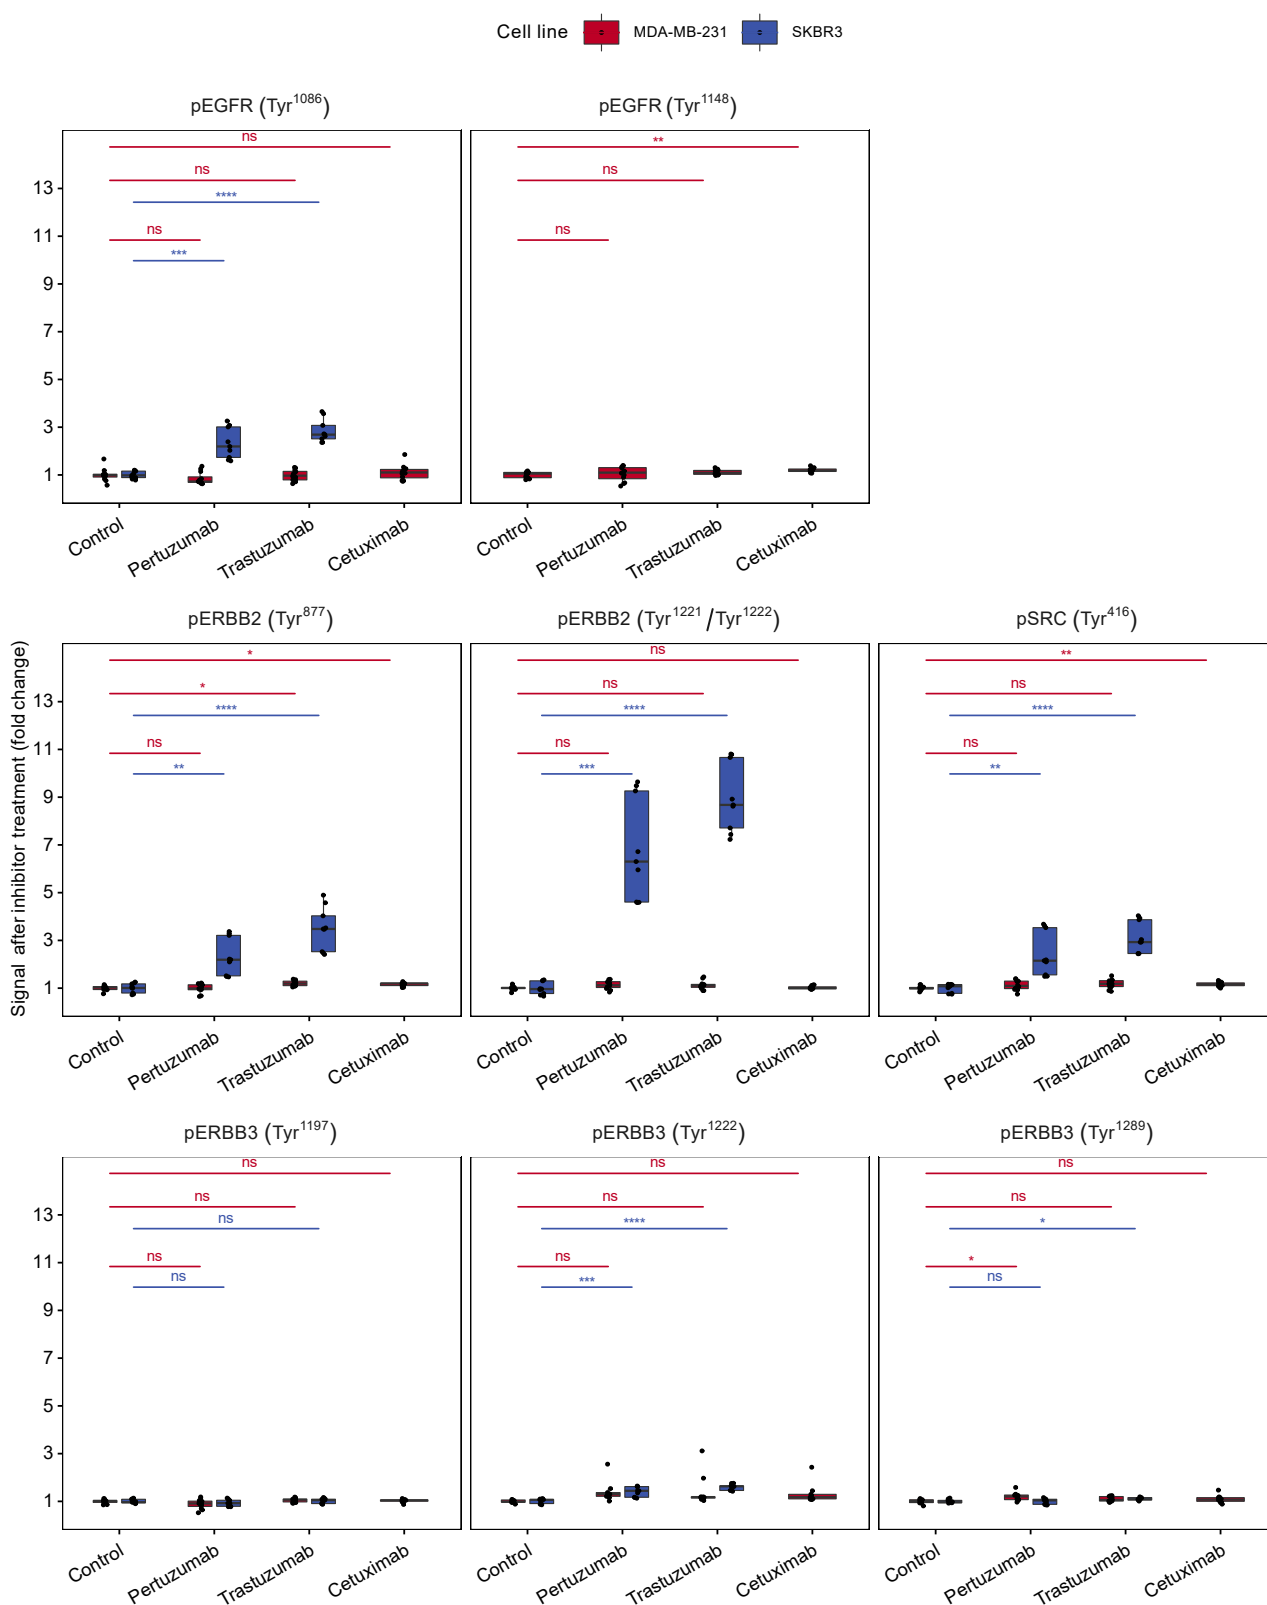

**Figure S7.** Antibody-induced phosphorylation of ERBB receptors in MDA-MB-231 and SKBR3. The protein phosphorylation of EGFR, ERBB2 and ERBB3 and SRC at indicated sites are displayed for MDA-MB-231 and SKBR3. Cells were treated with pertuzumab, trastuzumab or cetuximab or were left untreated for five minutes until the phosphorylation level was quantified by RPPA. Each condition is represented by 9-12 replicates. Significance levels indicate adjusted p values with the cutoffs: p-value.adj < 1 = n.s., < 0.05 = \*, < 0.01 = \*\*, < 0.001 = \*\*\*, < 1e-04 = \*\*\*\*.

**Table S1.** Primary antibodies.

| Product Name                                                                                            | Target Protein | UniProt ID             | Gene Symbol   | Specificity                                                 | Vendor            | Antibody ID | Host   |
|---------------------------------------------------------------------------------------------------------|----------------|------------------------|---------------|-------------------------------------------------------------|-------------------|-------------|--------|
| EGF Receptor (C74B9) Rabbit mAb                                                                         | EGFR           | <a href="#">P00533</a> | <i>EGFR</i>   | total                                                       | CST               | 2646        | rabbit |
| EGF Receptor Antibody                                                                                   | EGFR           | <a href="#">P00533</a> | <i>EGFR</i>   | total                                                       | CST               | 2232        | rabbit |
| Phospho-EGF Receptor (Tyr <sup>1086</sup> ) Antibody                                                    | EGFR           | <a href="#">P00533</a> | <i>EGFR</i>   | pTyr <sup>1086</sup>                                        | CST               | 2220        | rabbit |
| Phospho-EGF Receptor (Tyr <sup>1148</sup> ) Antibody                                                    | EGFR           | <a href="#">P00533</a> | <i>EGFR</i>   | pTyr <sup>1148</sup>                                        | CST               | 4404        | rabbit |
| Phospho-HER4/ErbB4 (Tyr <sup>1284</sup> )/EGFR (Tyr <sup>1173</sup> ) (21A9) Rabbit mAb                 | ERBB4          | <a href="#">P00533</a> | <i>EGFR</i>   | pTyr <sup>1173</sup>                                        | CST               | 4757        | rabbit |
| Epredia™ HER-2/c-erbB-2/neu Ab-17, mAb                                                                  | ERBB2          | <a href="#">P04626</a> | <i>ERBB2</i>  | total                                                       | Fisher scientific | 12612187    | mouse  |
| Phospho-HER2/ErbB2 (Tyr <sup>877</sup> ) Antibody                                                       | ERBB2          | <a href="#">P04626</a> | <i>ERBB2</i>  | pTyr <sup>877</sup>                                         | CST               | 2241        | rabbit |
| Phospho-HER2/ErbB2 (Tyr <sup>1221</sup> Tyr <sup>1222</sup> ) (6B12) Rabbit mAb                         | ERBB2          | <a href="#">P04626</a> | <i>ERBB2</i>  | pTyr <sup>1221</sup> pTyr <sup>1222</sup>                   | CST               | 2243        | rabbit |
| HER3/ErbB3 (D22C5) XP® Rabbit mAb                                                                       | ERBB3          | <a href="#">P21860</a> | <i>ERBB3</i>  | total                                                       | CST               | 12708       | rabbit |
| Anti-erbB-3/HER-3 Antibody, clone 2F12-AB2                                                              | ERBB3          | <a href="#">P21860</a> | <i>ERBB3</i>  | total                                                       | Merck             | 05-390      | mouse  |
| Phospho-HER3/ErbB3 (Tyr <sup>1197</sup> ) (C56E4) Rabbit mAb                                            | ERBB3          | <a href="#">P21860</a> | <i>ERBB3</i>  | pTyr <sup>1197</sup>                                        | CST               | 4561        | rabbit |
| Phospho-HER3/ErbB3 (Tyr <sup>1222</sup> ) (50C2) Rabbit mAb                                             | ERBB3          | <a href="#">P21860</a> | <i>ERBB3</i>  | pTyr <sup>1222</sup>                                        | CST               | 4784        | rabbit |
| Phospho-HER3/ErbB3 (Tyr <sup>1289</sup> ) (21D3) Rabbit mAb                                             | ERBB3          | <a href="#">P21860</a> | <i>ERBB3</i>  | pTyr <sup>1289</sup>                                        | CST               | 4791        | rabbit |
| Recombinant Anti-ErbB4 / HER4 antibody [EP192Y]                                                         | ERBB4          | <a href="#">Q15303</a> | <i>ERBB4</i>  | total                                                       | Abcam             | ab76303     | rabbit |
| Recombinant Anti-ErbB4 / HER4 (Tyr <sup>1162</sup> ) antibody [EP2270Y]                                 | ERBB4          | <a href="#">Q15303</a> | <i>ERBB4</i>  | pTyr <sup>1162</sup>                                        | Abcam             | ab68478     | rabbit |
| Phospho-HER4/ErbB4 (Tyr <sup>1284</sup> )/EGFR (Tyr <sup>1173</sup> ) (21A9) Rabbit mAb                 | ERBB4          | <a href="#">Q15303</a> | <i>ERBB4</i>  | pTyr <sup>1284</sup>                                        | CST               | 4757        | rabbit |
| c-Raf Antibody                                                                                          | cRAF           | <a href="#">P04049</a> | <i>RAF1</i>   | total                                                       | CST               | 9422        | rabbit |
| Phospho-c-Raf (Ser <sup>289</sup> Ser <sup>296</sup> Ser <sup>301</sup> ) Antibody                      | cRAF           | <a href="#">P04049</a> | <i>RAF1</i>   | pSer <sup>289</sup> pSer <sup>296</sup> pSer <sup>301</sup> | CST               | 9431        | rabbit |
| Phospho-c-Raf (Ser <sup>338</sup> ) (56A6) Rabbit mAb                                                   | cRAF           | <a href="#">P04049</a> | <i>RAF1</i>   | pSer <sup>338</sup>                                         | CST               | 9427        | rabbit |
| Phospho-c-Raf (Ser <sup>259</sup> ) Antibody                                                            | cRAF           | <a href="#">P04049</a> | <i>RAF1</i>   | pSer <sup>259</sup>                                         | CST               | 9421        | rabbit |
| Purified Mouse Anti-MEK1 Clone 25/MEK1 (RUO)                                                            | MEK1           | <a href="#">Q02750</a> | <i>MAP2K1</i> | total                                                       | BD Biosciences    | 610121      | mouse  |
| Phospho-MEK1/2 (Ser <sup>217</sup> Ser <sup>221</sup> ) (41G9) Rabbit mAb                               | MEK1           | <a href="#">Q02750</a> | <i>MAP2K1</i> | pSer <sup>217</sup> pSer <sup>221</sup>                     | CST               | 9154        | rabbit |
| Anti-phospho-MAP Kinase Kinase 1/2 (Ser <sup>217</sup> Ser <sup>221</sup> ) antibody produced in rabbit | MEK1           | <a href="#">Q02750</a> | <i>MAP2K1</i> | pSer <sup>217</sup> pSer <sup>221</sup>                     | Sigma             | M7683       | rabbit |
| Phospho-MEK1/2 (Ser <sup>217</sup> Ser <sup>221</sup> ) (41G9) Rabbit mAb                               | MEK2           | <a href="#">P36507</a> | <i>MAP2K2</i> | pSer <sup>222</sup> pSer <sup>226</sup>                     | CST               | 9154        | rabbit |
| p44/42 MAPK (Erk1/2) Antibody                                                                           | ERK1           | <a href="#">P27361</a> | <i>MAPK3</i>  | total                                                       | CST               | 9102        | rabbit |
| p44/42 MAPK (Erk1/2) Antibody                                                                           | ERK2           | <a href="#">P28482</a> | <i>MAPK1</i>  | total                                                       | CST               | 9102        | rabbit |
| Phospho-p44/42 MAPK (Erk1/2) (Thr <sup>202</sup> Tyr <sup>204</sup> ) (D13.14.4E) XP® Rabbit mAb        | ERK1           | <a href="#">P27361</a> | <i>MAPK3</i>  | pThr <sup>202</sup> pTyr <sup>204</sup>                     | CST               | 4370        | rabbit |

| Product Name                                                                                     | Target Protein | UniProt ID             | Gene Symbol    | Specificity                             | Vendor         | Antibody ID | Host   |
|--------------------------------------------------------------------------------------------------|----------------|------------------------|----------------|-----------------------------------------|----------------|-------------|--------|
| Phospho-p44/42 MAPK (Erk1/2) (Thr <sup>202</sup> Tyr <sup>204</sup> ) (D13.14.4E) XP® Rabbit mAb | ERK2           | <a href="#">P28482</a> | <i>MAPK1</i>   | pThr <sup>185</sup> pTyr <sup>187</sup> | CST            | 4370        | rabbit |
| Akt (pan) (C67E7) Rabbit mAb                                                                     | AKT1           | <a href="#">P31749</a> | <i>AKT1</i>    | total                                   | CST            | 4691        | rabbit |
| Akt (pan) (C67E7) Rabbit mAb                                                                     | AKT2           | <a href="#">P31751</a> | <i>AKT2</i>    | total                                   | CST            | 4691        | rabbit |
| Akt (pan) (C67E7) Rabbit mAb                                                                     | AKT3           | <a href="#">Q9Y243</a> | <i>AKT3</i>    | total                                   | CST            | 4691        | rabbit |
| A(610860) BD Transduction Laboratories™ Purified Mouse anti-Akt                                  | AKT1           | <a href="#">P31749</a> | <i>AKT1</i>    | total                                   | BD Biosciences | 610860      | rabbit |
| (610860) BD Transduction Laboratories™ Purified Mouse anti-Akt                                   | AKT2           | <a href="#">P31751</a> | <i>AKT2</i>    | total                                   | BD Biosciences | 610860      | rabbit |
| (610860) BD Transduction Laboratories™ Purified Mouse anti-Akt                                   | AKT3           | <a href="#">Q9Y243</a> | <i>AKT3</i>    | total                                   | BD Biosciences | 610860      | rabbit |
| Phospho-Akt (Thr <sup>308</sup> ) Antibody                                                       | AKT1           | <a href="#">P31749</a> | <i>AKT1</i>    | pThr <sup>308</sup>                     | CST            | 9275        | mouse  |
| Phospho-Akt (Thr <sup>308</sup> ) Antibody                                                       | AKT2           | <a href="#">P31751</a> | <i>AKT2</i>    | pThr <sup>309</sup>                     | CST            | 9275        | mouse  |
| Phospho-Akt (Thr <sup>308</sup> ) Antibody                                                       | AKT3           | <a href="#">Q9Y243</a> | <i>AKT3</i>    | pThr <sup>305</sup>                     | CST            | 9275        | mouse  |
| Phospho-Akt (Ser <sup>473</sup> ) Antibody                                                       | AKT1           | <a href="#">P31749</a> | <i>AKT1</i>    | pSer <sup>473</sup>                     | CST            | 9271        | rabbit |
| Phospho-Akt (Ser <sup>473</sup> ) Antibody                                                       | AKT2           | <a href="#">P31751</a> | <i>AKT2</i>    | pSer <sup>474</sup>                     | CST            | 9271        | rabbit |
| Phospho-Akt (Ser <sup>473</sup> ) Antibody                                                       | AKT3           | <a href="#">Q9Y243</a> | <i>AKT3</i>    | pSer <sup>472</sup>                     | CST            | 9271        | rabbit |
| p70 S6 Kinase (49D7) Rabbit mAb                                                                  | p70S6Kinase    | <a href="#">P23443</a> | <i>RPS6KB1</i> | total                                   | CST            | 2708        | rabbit |
| Phospho-p70 S6 Kinase (Thr <sup>389</sup> ) (108D2) Rabbit mAb                                   | P70S6Kinase    | <a href="#">P23443</a> | <i>RPS6KB1</i> | pThr <sup>389</sup>                     | CST            | 9234        | rabbit |
| Phospho-Src Family (Tyr <sup>416</sup> ) Antibody                                                | SRC            | <a href="#">P12931</a> | <i>SRC</i>     | pY <sup>419</sup>                       | CST            | 2101        | rabbit |
| Phospho-Src Family (Tyr <sup>416</sup> ) Antibody                                                | Yes            | <a href="#">P07947</a> | <i>Yes</i>     | pY <sup>426</sup>                       | CST            | 2101        | rabbit |
| Phospho-Src Family (Tyr <sup>416</sup> ) Antibody                                                | LCK            | <a href="#">P06239</a> | <i>LCK</i>     | pY <sup>394</sup>                       | CST            | 2101        | rabbit |
| Phospho-Src Family (Tyr <sup>416</sup> ) Antibody                                                | LYN            | <a href="#">P07948</a> | <i>LYN</i>     | pY <sup>397</sup>                       | CST            | 2101        | rabbit |
| GAPDH antibody [GT239]                                                                           | GAPDH          | <a href="#">P04406</a> | <i>GAPDH</i>   | total                                   | GeneTex        | GTX627408   | mouse  |

Table S2. Secondary antibodies.

| Product Name                                                                                       | Target Protein | Fluorophore         | Vendor            | Antibody ID | Host |
|----------------------------------------------------------------------------------------------------|----------------|---------------------|-------------------|-------------|------|
| F(ab') <sub>2</sub> -Goat anti-Rabbit IgG (H+L) Cross-Adsorbed Secondary Antibody, Alexa Fluor 680 | rabbit         | Alexa680            | Life Technologies | A21077      | goat |
| F(ab') <sub>2</sub> -Goat anti-Mouse IgG (H+L) Secondary Antibody, Alexa Fluor® 680 conjugate      | mouse          | Alexa680            | Life Technologies | A21059      | goat |
| Goat anti-Mouse IgG (H+L) Secondary Antibody, DyLight™ 800 4X PEG                                  | mouse          | DyLight™ 800 4X PEG | Thermo Fisher     | SA5-35521   | goat |

**Table S3.** Therapeutic antibodies, kinase inhibitors and ligands.

| Therapeutic antibodies targeting receptor tyrosine kinases                            |  |                |                        |             |               |            |
|---------------------------------------------------------------------------------------|--|----------------|------------------------|-------------|---------------|------------|
| Product Name                                                                          |  | Target Protein | Drug Name              | Vendor      |               |            |
| cetuximab                                                                             |  | EGFR           | Erbitux                | Merck KGaA  |               |            |
| trastuzumab                                                                           |  | ERBB2          | Herceptin              | Roche       |               |            |
| pertuzumab                                                                            |  | ERBB2          | Perjeta                | Roche       |               |            |
| lumretuzumab                                                                          |  | ERBB3          | RG7116                 | Roche       |               |            |
|                                                                                       |  |                |                        |             |               |            |
| Receptor tyrosine kinase inhibitor                                                    |  |                |                        |             |               |            |
| Product Name                                                                          |  | Target Protein | Drug Name              | Vendor      |               |            |
| erlotinib                                                                             |  | EGFR           | Tarceva                | Roche       |               |            |
|                                                                                       |  |                |                        |             |               |            |
| Ligands                                                                               |  |                |                        |             |               |            |
| Product Name                                                                          |  | Protein Name   | UniProt ID             | Gene Symbol | Vendor        | Product ID |
| EGF, recombinant, expressed in E. coli, lyophilized powder, suitable for cell culture |  | EGF            | <a href="#">P01133</a> | <i>EGF</i>  | Sigma Aldrich | E9644      |
| Recombinant Human Betacellulin Protein                                                |  | BTC            | <a href="#">P35070</a> | <i>BTC</i>  | R&D Systems   | 261-CE/CF  |
| Neuregulin/Heregulin-1 $\beta$ (NRG-1 $\beta$ /HRG-1 $\beta$ ), human recombinant     |  | NRG1/HRG1      | <a href="#">Q02297</a> | <i>NRG1</i> | BioVision     | 4711       |
| Recombinant Human Amphiregulin Protein                                                |  | AREG           | <a href="#">P15514</a> | <i>AREG</i> | R&D Systems   | 262-AR/CF  |
| Transforming Growth Factor- $\alpha$ human                                            |  | TGF- $\alpha$  | <a href="#">P01135</a> | <i>TGFA</i> | Sigma Aldrich | T7924      |

**Table S4.** Model reactions. Each row corresponds to a molecular reaction as indicated by the model structure depicted in Figure 2. *Ligand* and *drug* are representatives for the individual ligand and drug concentrations. (NISS) indicates that corresponding reactions do not contribute to the steady state.

| Educt    | Product  | Rate                                                     | Description                           |
|----------|----------|----------------------------------------------------------|---------------------------------------|
| 2 · R1   | R1R1     | build_R1R1 · (1/(1+drug_R1R1)) · R1 · R1 · ligand        | R1R1 dimerization (NISS)              |
| R1R1     | 2 · R1   | decay_R1R1 · R1R1                                        | R1R1 decay                            |
| R1 + R2  | R1R2     | build_R1R2 · (1/(1+drug_R1R2)) · R1 · R2 · ligand        | R1R2 dimerization (NISS)              |
| R1R2     | R1 + R2  | decay_R1R2 · R1R2                                        | R1R2 decay                            |
| R1 + R3  | R1R3     | build_R1R3 · (1/(1+drug_R1R3)) · R1 · R3 · ligand        | R1R3 dimerization (NISS)              |
| R1R3     | R1 + R3  | decay_R1R3 · R1R3                                        | R1R3 decay                            |
| R2 + R3  | R2R3     | build_R2R3 · (1/(1+drug_R2R3)) · R2 · R3 · ligand        | R2R3 dimerization (NISS)              |
| R2R3     | R2 + R3  | decay_R2R3 · R2R3                                        | R2R3 decay                            |
| R1 + R2  | R1R2_off | build_R1R2off · R1 · R2 · drug                           | R1R2 dimerization by tras/pert (NISS) |
| R1R2_off | R1 + R2  | decay_R1R2off · R1R2_off                                 | R1R2off decay                         |
| R2 + R3  | R2R3_off | build_R2R3off · R2 · R3 · drug                           | R2R3 dimerization by tras/pert (NISS) |
| R2R3_off | R2 + R3  | decay_R2R3off · R2R3_off                                 | R2R3_off decay                        |
| 2 · R2   | R2R2_off | build_R2R2off · R2 · R2 · drug                           | R2R2 dimerization by tras/pert (NISS) |
| R2R2_off | 2 · R2   | decay_R2R2off · R2R2_off                                 | R2R2_off decay                        |
| R1R1     |          | degrade_R1R1 · R1R1                                      | R1R1 degradation (NISS)               |
| R1R2     |          | degrade_R1R2 · R1R2                                      | R1R2 degradation (NISS)               |
| R1R3     |          | degrade_R1R3 · R1R3                                      | R1R3 degradation (NISS)               |
| R2R3     |          | degrade_R2R3 · R2R3                                      | R2R3 degradation (NISS)               |
| R3       |          | degrade_R3_lumretuzumab · R3 · drug                      | R3 degradation by lum (NISS)          |
| AKT      | pAKT     | phospho_AKT_R1R1 · AKT · R1R1                            | AKT to pAKT by R1R1 (NISS)            |
| AKT      | pAKT     | phospho_AKT_R1R2 · AKT · R1R2                            | AKT to pAKT by R1R2 (NISS)            |
| AKT      | pAKT     | phospho_AKT_R1R3 · AKT · R1R3                            | AKT to pAKT by R1R3 (NISS)            |
| AKT      | pAKT     | phospho_AKT_R2R3 · AKT · R2R3                            | AKT to pAKT by R2R3 (NISS)            |
| AKT      | pAKT     | phospho_AKT_basal · AKT                                  | basal AKT to pAKT                     |
| pAKT     | AKT      | dephospho_pAKT · pAKT · mutation                         | pAKT to AKT                           |
| cRAF     | pcRAF    | phospho_cRAF_R1R1 · (1/(1+drug_cRAF_R1R1)) · cRAF · R1R1 | cRAF activation by R1R1 (NISS)        |
| cRAF     | pcRAF    | phospho_cRAF_R1R2 · (1/(1+drug_cRAF_R1R2)) · cRAF · R1R2 | cRAF activation by R1R2 (NISS)        |
| cRAF     | pcRAF    | phospho_cRAF_R1R3 · (1/(1+drug_cRAF_R1R3)) · cRAF · R1R3 | cRAF activation by R1R3 (NISS)        |
| cRAF     | pcRAF    | phospho_cRAF_R2R3 · (1/(1+drug_cRAF_R2R3)) · cRAF · R2R3 | cRAF activation by R2R3 (NISS)        |
| cRAF     | pcRAF    | phospho_cRAF_basal · cRAF                                | basal cRAF activation                 |
| pcRAF    | cRAF     | pcRAF · deact_cRAF                                       | cRAF inactivation                     |
| MEK      | pMEK     | phospho_MEK · MEK · pcRAF                                | MEK to pMEK                           |
| pMEK     | ppMEK    | phospho_MEK · pMEK · pcRAF                               | pMEK to ppMEK                         |
| MEK      | pMEK     | phospho_MEK_basal · MEK                                  | basal MEK to pMEK                     |
| pMEK     | ppMEK    | phospho_MEK_basal · pMEK                                 | basal pMEK to ppMEK                   |
| ppMEK    | pMEK     | dephospho_pMEK · ppMEK                                   | ppMEK to pMEK                         |
| pMEK     | MEK      | dephospho_pMEK · pMEK                                    | pMEK to MEK                           |
| ERK      | pERK     | phospho_ERK · ERK · ppMEK                                | ERK to pERK                           |
| pERK     | ppERK    | phospho_ERK · pERK · ppMEK                               | pERK to ppERK                         |
| ppERK    | pERK     | dephospho_pERK · ppERK                                   | ppERK to pERK                         |
| pERK     | ERK      | dephospho_pERK · pERK                                    | pERK to ERK                           |
| S6K      | pPS6K    | phospho_S6K_AKT · S6K · pAKT                             | S6K to pPS6K by pAKT                  |
| S6K      | pPS6K    | phospho_S6K_ERK · S6K · ppERK                            | S6K to pPS6K by ppERK                 |
| pPS6K    | S6K      | dephospho_S6K · pPS6K                                    | pPS6K to S6K                          |

**Table S5.** Observables. Observables were computed with respect to model states as indicated. Measured components indicated with \* and corresponding fixed offsets are taken vom Niepel *et al.* [1].

| Measured component | Observable function                                                                                                                                               |
|--------------------|-------------------------------------------------------------------------------------------------------------------------------------------------------------------|
| pEGFR_obs          | $\log_{10}(\text{scale\_pR1} \cdot (2 \cdot \text{R1R1} + \text{R1R2} + \text{R1R3} + \text{R1R2\_off}) + \text{offset\_pR1})$                                    |
| pERBB2_obs         | $\log_{10}(\text{scale\_pR2} \cdot (\text{R1R2} + \text{R2R3} + \text{R1R2\_off} + \text{R2R3\_off} + 2 \cdot \text{R2R2\_off}) + \text{offset\_pR2})$            |
| pERBB3_obs         | $\log_{10}(\text{scale\_pR3} \cdot (\text{R1R3} + \text{R2R3} + \text{R2R3\_off}) + \text{offset\_pR3})$                                                          |
| pAKT_obs           | $\log_{10}(\text{scale\_pAkt} \cdot \text{pAKT} + \text{offset\_pAkt})$                                                                                           |
| pcRAF_obs          | $\log_{10}(\text{scale\_pcRAF} \cdot \text{pcRAF} + \text{offset\_pcRAF})$                                                                                        |
| pMEK_obs           | $\log_{10}(\text{scale\_pMEK} \cdot (\text{pMEK} + \text{ppMEK}) + \text{offset\_pMEK})$                                                                          |
| pERK_obs           | $\log_{10}(\text{scale\_pERK} \cdot (\text{pERK} + \text{ppERK}) + \text{offset\_pERK})$                                                                          |
| pp70S6K_obs        | $\log_{10}(\text{scale\_pPS6K} \cdot \text{pPS6K} + \text{offset\_pPS6K})$                                                                                        |
| tEGFR_obs          | $\log_{10}(\text{scale\_R1} \cdot (\text{R1} + 2 \cdot \text{R1R1} + \text{R1R2} + \text{R1R3} + \text{R1R2\_off}) + \text{offset\_tR1})$                         |
| tERBB2_obs         | $\log_{10}(\text{scale\_R2} \cdot (\text{R2} + \text{R1R2} + \text{R2R3} + \text{R1R2\_off} + \text{R2R3\_off} + 2 \cdot \text{R2R2\_off}) + \text{offset\_tR2})$ |
| tERBB3_obs         | $\log_{10}(\text{scale\_R3} \cdot (\text{R3} + \text{R1R3} + \text{R2R3} + \text{R2R3\_off}) + \text{offset\_tR3})$                                               |
| tAKT_obs           | $\log_{10}(\text{scale\_AKT\_HRG} \cdot (\text{AKT} + \text{pAKT}) + \text{offset\_tAKT\_HRG})$                                                                   |
| tcRAF_obs          | $\log_{10}(\text{scale\_cRAF\_HRG} \cdot (\text{cRAF} + \text{pcRAF}) + \text{offset\_tcRAF\_HRG})$                                                               |
| tMEK_obs           | $\log_{10}(\text{scale\_MEK} \cdot (\text{MEK} + \text{pMEK} + \text{ppMEK}) + \text{offset\_tMEK})$                                                              |
| tERK_obs           | $\log_{10}(\text{scale\_ERK} \cdot (\text{ERK} + \text{pERK} + \text{ppERK}) + \text{offset\_tERK})$                                                              |
| t70S6K_obs         | $\log_{10}(\text{scale\_S6K} \cdot (\text{S6K} + \text{pPS6K}) + \text{offset\_tS6K})$                                                                            |
| R1_tot*            | $\log_{10}((\text{R1} + 2 \cdot \text{R1R1} + \text{R1R2} + \text{R1R3} + \text{R1R2\_off}) + 8.44\text{e-}05)$                                                   |
| R2_tot*            | $\log_{10}((\text{R2} + \text{R1R2} + \text{R2R3} + \text{R1R2\_off} + \text{R2R3\_off} + 2 \cdot \text{R2R2\_off}) + 8.44\text{e-}05)$                           |
| R3_tot*            | $\log_{10}((\text{R3} + \text{R1R3} + \text{R2R3} + \text{R2R3\_off}) + 6.96\text{e-}05)$                                                                         |
| AKT_tot*           | $\log_{10}((\text{AKT} + \text{pAKT}) + 2.54\text{e-}05)$                                                                                                         |
| ERK_tot*           | $\log_{10}((\text{ERK} + \text{pERK} + \text{ppERK}) + 2.14\text{e-}05)$                                                                                          |

**Table S6.** Estimated parameter values with confidence intervals. Parameter values of the global optimum for the ODE model calibrated on MCF7 and T47D cell lines along with profile-likelihood based confidence intervals all shown on logarithmic scale.

| Parameter name           | Estimated value (log10) | 95%-confidence interval<br>[log10(lower bound)] | 95%-confidence interval<br>[log10(upper bound)] |
|--------------------------|-------------------------|-------------------------------------------------|-------------------------------------------------|
| ActRatio_pcRAF_R1R1_EGF  | 3.24                    | 3.01                                            | 3.48                                            |
| ActRatio_pcRAF_R1R1_TGF  | 3.51                    | 3.20                                            | 3.79                                            |
| AKT_MCF7                 | -0.90                   | -0.94                                           | -0.86                                           |
| AKT_T47D                 | -1.58                   | -1.62                                           | -1.53                                           |
| build_R1R1_BTC           | 1.73                    | 1.41                                            | 2.07                                            |
| build_R1R1_EGF           | 1.04                    | 0.84                                            | 1.25                                            |
| build_R1R1_TGF           | 0.15                    | -0.09                                           | 0.38                                            |
| build_R1R3_BTC           | -2.88                   | -3.29                                           | -0.93                                           |
| build_R1R3_EGF           | -2.94                   | -3.61                                           | -1.62                                           |
| build_R1R3_TGF           | -0.98                   | -1.50                                           | -0.72                                           |
| cRAF_MCF7                | -0.73                   | -0.97                                           | -0.51                                           |
| cRAF_T47D                | -0.56                   | -0.76                                           | -0.38                                           |
| degrade_R1R3_BTC         | -0.77                   | -1.27                                           | 1.29                                            |
| degrade_R1R3_EGF         | -1.01                   | -1.70                                           | 0.55                                            |
| degrade_R1R3_HRG         | -0.28                   | -0.57                                           | 0.13                                            |
| degrade_R1R3_TGF         | 1.84                    | 1.30                                            | 3.06                                            |
| degrade_R2R3_HRG         | -1.70                   | -1.93                                           | -1.35                                           |
| degrade_R3_lumretuzumab  | -2.47                   | -2.50                                           | -2.43                                           |
| dephospho_pERK           | -0.05                   | -0.23                                           | 0.27                                            |
| dephospho_pMEK           | 0.00                    | -0.13                                           | 0.18                                            |
| dephospho_S6K            | -1.54                   | -1.62                                           | -1.46                                           |
| drug_R1R1_cetuximab      | 1.45                    | 1.23                                            | 1.70                                            |
| drug_R1R1_erlotinib      | 1.26                    | 0.79                                            | 1.74                                            |
| drug_R1R2_cetuximab      | 1.00                    | 0.84                                            | 1.17                                            |
| drug_R1R2_erlotinib      | 1.22                    | 0.99                                            | 1.48                                            |
| drug_R1R2_pertuzumab     | -0.07                   | -0.22                                           | 0.06                                            |
| drug_R1R2_trastuzumab    | -0.32                   | -0.53                                           | -0.15                                           |
| drug_R1R3_erlotinib      | 0.45                    | 0.14                                            | 0.81                                            |
| drug_R2R3_erlotinib      | 0.01                    | -0.16                                           | 0.16                                            |
| drug_R2R3_lumretuzumab   | 1.23                    | 1.04                                            | 1.44                                            |
| drug_R2R3_pertuzumab     | 1.15                    | 1.01                                            | 1.31                                            |
| drug_R2R3_trastuzumab    | 0.05                    | -0.11                                           | 0.19                                            |
| drug_cRAF_R1R2_erlotinib | -0.06                   | -0.91                                           | 0.28                                            |
| drug_cRAF_R2R3_erlotinib | 0.68                    | 0.34                                            | 1.33                                            |
| ERK_MCF7                 | -2.90                   | -2.93                                           | -2.86                                           |
| ERK_T47D                 | -3.22                   | -3.26                                           | -3.19                                           |
| Kd_pAKT_basal            | -1.99                   | -2.10                                           | -1.88                                           |
| Kd_pAKT_R1R2             | 1.96                    | 1.70                                            | 2.33                                            |
| Kd_pAKT_R2R3             | 2.05                    | 1.80                                            | 2.42                                            |
| Kd_pcRAF_basal           | -1.23                   | -1.46                                           | -1.04                                           |
| Kd_pcRAF_R1R2            | 3.16                    | 2.86                                            | 3.57                                            |
| Kd_pcRAF_R1R3            | 2.93                    | 2.61                                            | 3.36                                            |
| Kd_pcRAF_R2R3            | 2.32                    | 2.03                                            | 2.72                                            |
| Kd_R1R2_BTC              | 1.38                    | 0.95                                            | 1.68                                            |
| Kd_R1R2_EGF              | 0.63                    | 0.23                                            | 0.91                                            |
| Kd_R1R2_TGF              | 0.32                    | -0.07                                           | 0.58                                            |
| Kd_R1R2off_pertuzumab    | 0.22                    | -0.18                                           | 0.50                                            |
| Kd_R1R2off_trastuzumab   | 0.60                    | 0.21                                            | 0.86                                            |
| Kd_R1R3_HRG              | 0.27                    | -0.14                                           | 0.57                                            |
| Kd_R2R2off_pertuzumab    | -0.31                   | -0.68                                           | -0.07                                           |
| Kd_R2R2off_trastuzumab   | -0.29                   | -0.67                                           | -0.04                                           |
| Kd_R2R3_HRG              | 0.57                    | 0.17                                            | 0.85                                            |
| Kd_R2R3off_pertuzumab    | -2.97                   | -3.13                                           | -2.84                                           |
| Kd_R2R3off_trastuzumab   | -3.13                   | -3.34                                           | -2.98                                           |



| Parameter name    | Estimated value (log10) | 95%-confidence interval<br>[log10(lower bound)] | 95%-confidence interval<br>[log10(upper bound)] |
|-------------------|-------------------------|-------------------------------------------------|-------------------------------------------------|
| MEK_MCF7          | -1.80                   | -2.03                                           | -1.60                                           |
| MEK_T47D          | -1.46                   | -1.67                                           | -1.31                                           |
| mutation_T47D     | -1.30                   | -1.39                                           | -1.22                                           |
| phospho_ERK       | 4.12                    | 3.85                                            | 4.50                                            |
| phospho_MEK       | -0.40                   | -0.64                                           | -0.14                                           |
| phospho_MEK_basal | -2.61                   | -Inf                                            | -2.23                                           |
| phospho_S6K_AKT   | 0.21                    | 0.08                                            | 0.34                                            |
| phospho_S6K_ERK   | 2.76                    | 2.56                                            | 3.01                                            |
| R1_MCF7           | -1.99                   | -2.02                                           | -1.95                                           |
| R1_T47D           | -1.96                   | -2.00                                           | -1.93                                           |
| R2_MCF7           | -1.74                   | -1.78                                           | -1.71                                           |
| R2_T47D           | -1.34                   | -1.37                                           | -1.30                                           |
| R3_MCF7           | -1.44                   | -1.47                                           | -1.41                                           |
| R3_T47D           | -1.54                   | -1.56                                           | -1.51                                           |
| S6K_MCF7          | 0.48                    | 0.47                                            | 0.50                                            |
| S6K_T47D          | -0.85                   | -0.90                                           | -0.80                                           |
| offset_pcRAF_BTC  | -0.07                   | -0.10                                           | -0.04                                           |
| offset_pcRAF_EGF  | -0.07                   | -0.09                                           | -0.05                                           |
| offset_pcRAF_HRG  | -0.05                   | -0.08                                           | -0.03                                           |
| offset_pcRAF_TGF  | -0.12                   | -0.16                                           | -0.09                                           |
| offset_pAkt_BTC   | -0.31                   | -0.36                                           | -0.27                                           |
| offset_pAkt_EGF   | -0.44                   | -0.51                                           | -0.39                                           |
| offset_pAkt_HRG   | -0.83                   | -0.96                                           | -0.73                                           |
| offset_pAkt_TGF   | -0.32                   | -0.38                                           | -0.27                                           |
| offset_pERK_EGF   | -1.53                   | -2.42                                           | -1.27                                           |
| offset_pMEK_BTC   | -0.28                   | -0.31                                           | -0.25                                           |
| offset_pMEK_EGF   | -0.35                   | -0.37                                           | -0.32                                           |
| offset_pMEK_HRG   | -0.41                   | -0.46                                           | -0.37                                           |
| offset_pMEK_TGF   | -0.26                   | -0.29                                           | -0.24                                           |
| offset_pPS6K_BTC  | -0.73                   | -0.87                                           | -0.63                                           |
| offset_pPS6K_EGF  | -0.92                   | -1.16                                           | -0.78                                           |
| offset_pPS6K_TGF  | -0.59                   | -0.69                                           | -0.51                                           |
| offset_pR1_BTC    | -0.46                   | -0.49                                           | -0.44                                           |
| offset_pR1_EGF    | -0.97                   | -1.00                                           | -0.95                                           |
| offset_pR1_HRG    | -0.73                   | -0.76                                           | -0.71                                           |
| offset_pR1_TGF    | -0.62                   | -0.64                                           | -0.59                                           |
| offset_pR2_BTC    | -0.30                   | -0.31                                           | -0.29                                           |
| offset_pR2_EGF    | -0.04                   | -0.05                                           | -0.03                                           |
| offset_pR2_HRG    | -0.22                   | -0.23                                           | -0.20                                           |
| offset_pR2_TGF    | -0.40                   | -0.41                                           | -0.38                                           |
| offset_pR3_BTC    | -0.11                   | -0.12                                           | -0.10                                           |
| offset_pR3_EGF    | -0.10                   | -0.11                                           | -0.08                                           |
| offset_pR3_HRG    | -0.16                   | -0.18                                           | -0.15                                           |
| offset_pR3_TGF    | -0.14                   | -0.15                                           | -0.12                                           |
| offset_tAKT_HRG   | -0.15                   | -0.18                                           | -0.13                                           |
| offset_tcRAF_HRG  | -0.07                   | -0.15                                           | -0.02                                           |
| offset_tERK_BTC   | -0.16                   | -0.21                                           | -0.12                                           |
| offset_tERK_EGF   | -0.11                   | -0.15                                           | -0.07                                           |
| offset_tERK_HRG   | -0.15                   | -0.21                                           | -0.11                                           |
| offset_tERK_TGF   | -0.15                   | -0.21                                           | -0.11                                           |
| offset_tMEK_BTC   | -0.02                   | -0.03                                           | -0.01                                           |
| offset_tMEK_EGF   | -0.07                   | -0.08                                           | -0.06                                           |
| offset_tMEK_HRG   | -0.04                   | -0.05                                           | -0.03                                           |
| offset_tMEK_TGF   | -0.05                   | -0.06                                           | -0.04                                           |
| offset_tR1_BTC    | -0.89                   | -0.90                                           | -0.87                                           |
| offset_tR1_EGF    | -0.99                   | -1.01                                           | -0.97                                           |
| offset_tR1_HRG    | -0.92                   | -0.94                                           | -0.91                                           |
| offset_tR1_TGF    | -0.99                   | -1.01                                           | -0.98                                           |

| Parameter name  | Estimated value (log10) | 95%-confidence interval<br>[log10(lower bound)] | 95%-confidence interval<br>[log10(upper bound)] |
|-----------------|-------------------------|-------------------------------------------------|-------------------------------------------------|
| offset_tR2_BTC  | -0.51                   | -0.65                                           | -0.41                                           |
| offset_tR2_EGF  | -0.55                   | -0.73                                           | -0.44                                           |
| offset_tR2_HRG  | -0.76                   | -1.15                                           | -0.58                                           |
| offset_tR2_TGF  | -0.55                   | -0.72                                           | -0.44                                           |
| offset_tR3_EGF  | -0.73                   | -2.24                                           | -0.44                                           |
| offset_tR3_HRG  | -0.17                   | -0.26                                           | -0.10                                           |
| offset_tS6K_BTC | -1.13                   | -1.32                                           | -1.01                                           |
| offset_tS6K_EGF | -1.05                   | -1.20                                           | -0.95                                           |
| offset_tS6K_HRG | -1.51                   | -2.50                                           | -1.25                                           |
| offset_tS6K_TGF | -1.26                   | -1.56                                           | -1.10                                           |
| scale_AKT_HRG   | 0.79                    | 0.74                                            | 0.85                                            |
| scale_pcRAF_BTC | 0.82                    | 0.62                                            | 1.03                                            |
| scale_pcRAF_EGF | 0.64                    | 0.43                                            | 0.87                                            |
| scale_pcRAF_HRG | 0.73                    | 0.51                                            | 0.95                                            |
| scale_pcRAF_TGF | 0.93                    | 0.72                                            | 1.15                                            |
| scale_ERK_BTC   | 2.61                    | 2.52                                            | 2.71                                            |
| scale_ERK_EGF   | 2.57                    | 2.47                                            | 2.67                                            |
| scale_ERK_HRG   | 2.64                    | 2.55                                            | 2.74                                            |
| scale_ERK_TGF   | 2.64                    | 2.55                                            | 2.74                                            |
| scale_pAkt_BTC  | 1.91                    | 1.82                                            | 2.00                                            |
| scale_pAkt_EGF  | 1.98                    | 1.88                                            | 2.08                                            |
| scale_pAkt_HRG  | 1.96                    | 1.90                                            | 2.03                                            |
| scale_pAkt_TGF  | 1.97                    | 1.88                                            | 2.08                                            |
| scale_pERK_BTC  | 3.76                    | 3.68                                            | 3.86                                            |
| scale_pERK_EGF  | 3.74                    | 3.64                                            | 3.85                                            |
| scale_pERK_HRG  | 3.92                    | 3.83                                            | 4.02                                            |
| scale_pERK_TGF  | 3.77                    | 3.68                                            | 3.86                                            |
| scale_pMEK_BTC  | 0.19                    | 0.12                                            | 0.26                                            |
| scale_pMEK_EGF  | 0.20                    | 0.13                                            | 0.25                                            |
| scale_pMEK_TGF  | 0.14                    | 0.06                                            | 0.22                                            |
| scale_pPS6K_BTC | 0.63                    | 0.54                                            | 0.72                                            |
| scale_pPS6K_EGF | 0.67                    | 0.58                                            | 0.76                                            |
| scale_pPS6K_HRG | 0.61                    | 0.53                                            | 0.70                                            |
| scale_pPS6K_TGF | 0.62                    | 0.53                                            | 0.71                                            |
| scale_pR1_BTC   | 2.27                    | 2.04                                            | 2.62                                            |
| scale_pR1_EGF   | 1.91                    | 1.67                                            | 2.28                                            |
| scale_pR1_HRG   | 2.01                    | 1.77                                            | 2.37                                            |
| scale_pR1_TGF   | 2.26                    | 2.03                                            | 2.62                                            |
| scale_pR2_BTC   | 2.50                    | 2.29                                            | 2.83                                            |
| scale_pR2_EGF   | 2.11                    | 1.89                                            | 2.46                                            |
| scale_pR2_HRG   | 2.11                    | 1.91                                            | 2.45                                            |
| scale_pR2_TGF   | 2.38                    | 2.18                                            | 2.72                                            |
| scale_pR3_EGF   | 1.24                    | 0.64                                            | 1.54                                            |
| scale_pR3_HRG   | -0.92                   | -1.14                                           | -0.58                                           |
| scale_pR3_TGF   | 1.55                    | 1.32                                            | 1.76                                            |
| scale_R2_BTC    | 1.56                    | 1.51                                            | 1.61                                            |
| scale_R2_EGF    | 1.59                    | 1.55                                            | 1.64                                            |
| scale_R2_HRG    | 1.65                    | 1.61                                            | 1.70                                            |
| scale_R2_TGF    | 1.57                    | 1.53                                            | 1.62                                            |
| scale_R3_BTC    | 1.73                    | 1.70                                            | 1.76                                            |
| scale_R3_EGF    | 1.68                    | 1.62                                            | 1.73                                            |
| scale_R3_HRG    | 1.59                    | 1.54                                            | 1.64                                            |
| scale_R3_TGF    | 1.74                    | 1.71                                            | 1.77                                            |
| scale_S6K_EGF   | 0.00                    | -0.01                                           | 0.02                                            |
| scale_S6K_HRG   | 0.02                    | 0.01                                            | 0.04                                            |
| scale_S6K_TGF   | 0.00                    | -0.01                                           | 0.02                                            |
| sigma_EGFR      | -1.10                   | -1.13                                           | -1.07                                           |
| sigma_ERBB2     | -1.42                   | -1.45                                           | -1.40                                           |

| Parameter name    | Estimated value (log10) | 95%-confidence interval<br>[log10(lower bound)] | 95%-confidence interval<br>[log10(upper bound)] |
|-------------------|-------------------------|-------------------------------------------------|-------------------------------------------------|
| sigma_ERBB3       | -1.35                   | -1.38                                           | -1.32                                           |
| sigma_pAKT_obs    | -1.00                   | -1.02                                           | -0.97                                           |
| sigma_pcRAF_obs   | -1.18                   | -1.21                                           | -1.15                                           |
| sigma_pEGFR_obs   | -0.96                   | -0.98                                           | -0.93                                           |
| sigma_pERBB2_obs  | -1.25                   | -1.28                                           | -1.22                                           |
| sigma_pERBB3_obs  | -1.29                   | -1.32                                           | -1.26                                           |
| sigma_pERK_obs    | -0.70                   | -0.73                                           | -0.67                                           |
| sigma_pMEK_obs    | -1.14                   | -1.16                                           | -1.11                                           |
| sigma_pp70S6K_obs | -1.00                   | -1.02                                           | -0.97                                           |
| sigma_t70S6K_obs  | -1.37                   | -1.40                                           | -1.35                                           |
| sigma_tAKT_obs    | -1.51                   | -1.57                                           | -1.46                                           |
| sigma_tcRAF_obs   | -1.48                   | -1.53                                           | -1.42                                           |
| sigma_tERK_obs    | -1.39                   | -1.41                                           | -1.36                                           |
| sigma_tMEK_obs    | -1.48                   | -1.51                                           | -1.45                                           |

**Table S7.** Correlation coefficients of signaling features. The simulated signaling features tested for the linear proliferation model are listed along with their correlation coefficients in respect to the viability scores. Features for R2R3 were not calculated as this dimer is only formed upon NRG1 treatment, resulting in too little data points for the correlation analysis.

| Feature     | Coefficient |
|-------------|-------------|
| AUC_R1R1    | 0.44        |
| AUC_R1R2    | 0.56        |
| AUC_R1R3    | -0.02       |
| AUC_pAKT    | 0.79        |
| AUC_ppERK   | 0.67        |
| AUC_pPS6K   | 0.73        |
| peak_R1R1   | 0.50        |
| peak_R1R2   | 0.70        |
| peak_R1R3   | 0.07        |
| peak_pAKT   | 0.71        |
| peak_ppERK  | 0.58        |
| peak_pPS6K  | 0.62        |
| slope_R1R1  | 0.50        |
| slope_R1R2  | 0.67        |
| slope_R1R3  | 0.30        |
| slope_pAKT  | 0.38        |
| slope_ppERK | 0.20        |
| slope_pPS6K | -0.08       |

**Table S8.** Parameters of the regression model.

| Parameter name | Estimate | Std. Error | t value | p value |
|----------------|----------|------------|---------|---------|
| Intercept      | 0.917    | 0.007      | 138.646 | < 2e-16 |
| AUC_pAKT       | 0.080    | 0.0245     | 3.288   | 0.002   |
| AUC_pPS6K      | -0.009   | 0.023      | -0.380  | 0.706   |

**Table S9.** Results of the  $L_1$  analysis. Parameters fitted during the  $L_1$  analysis are listed. Only indicated parameters were fitted with  $L_1$  prior. Note, the parameters *PI3Kdiff\_cellline* describe the difference in PI3K activity in relation to MCF7. MDA-MB-231 and SKBR3 are not mutated in PI3K, but have a different PI3K activity compared to MCF7.

| Parameter name                                                                | Estimated value (log10) |
|-------------------------------------------------------------------------------|-------------------------|
| <b>Protein totals and PI3K activity fitted without <math>L_1</math> prior</b> |                         |
| AKT_MDA231                                                                    | -1.53                   |
| AKT_SKBR3                                                                     | -1.66                   |
| ERK_MDA231                                                                    | -3.92                   |
| ERK_SKBR3                                                                     | -2.88                   |
| MEK_MDA231                                                                    | -1.09                   |
| MEK_SKBR3                                                                     | -2.03                   |
| R1_MDA231                                                                     | -1.06                   |
| R1_SKBR3                                                                      | -1.31                   |
| R2_MDA231                                                                     | -1.90                   |
| R2_SKBR3                                                                      | 0.15                    |
| R3_MDA231                                                                     | -2.45                   |
| R3_SKBR3                                                                      | -1.69                   |
| S6K_MDA231                                                                    | -0.87                   |
| S6K_SKBR3                                                                     | -0.06                   |
| cRAF_MDA231                                                                   | -0.88                   |
| cRAF_SKBR3                                                                    | -0.99                   |
| PI3Kdiff_MDA231                                                               | -0.38                   |
| PI3Kdiff_SKBR3                                                                | -1.95                   |
| <b><math>L_1</math> parameters fitted with <math>L_1</math> prior</b>         |                         |
| ActRatio_pcRAF_R1R1_L1_MDA231                                                 | 0.03                    |
| ActRatio_pcRAF_R1R1_L1_SKBR3                                                  | 0.00                    |
| Kd_R1R2_L1_MDA231                                                             | -1.08                   |
| Kd_R1R2_L1_SKBR3                                                              | -0.45                   |
| Kd_R1R2off_L1_MDA231                                                          | -1.14                   |
| Kd_R1R2off_L1_SKBR3                                                           | -1.94                   |
| Kd_R1R3_L1_MDA231                                                             | 1.30                    |
| Kd_R1R3_L1_SKBR3                                                              | -1.58                   |
| Kd_R2R2off_L1_MDA231                                                          | -0.19                   |
| Kd_R2R2off_L1_SKBR3                                                           | -2.50                   |
| Kd_R2R3_L1_MDA231                                                             | 0.00                    |
| Kd_R2R3_L1_SKBR3                                                              | -2.79                   |
| Kd_R2R3off_L1_MDA231                                                          | 1.55                    |
| Kd_R2R3off_L1_SKBR3                                                           | 0.00                    |
| Kd_pAKT_R1R1_L1_MDA231                                                        | 0.00                    |
| Kd_pAKT_R1R1_L1_SKBR3                                                         | 0.00                    |
| Kd_pAKT_R1R2_L1_MDA231                                                        | -0.34                   |
| Kd_pAKT_R1R2_L1_SKBR3                                                         | -0.32                   |
| Kd_pAKT_R1R3_L1_MDA231                                                        | 0.00                    |
| Kd_pAKT_R1R3_L1_SKBR3                                                         | 0.00                    |
| Kd_pAKT_R2R3_L1_MDA231                                                        | 0.00                    |
| Kd_pAKT_R2R3_L1_SKBR3                                                         | 0.98                    |
| Kd_pAKT_basal_L1_MDA231                                                       | 0.35                    |
| Kd_pAKT_basal_L1_SKBR3                                                        | 0.00                    |
| Kd_pcRAF_R1R2_L1_MDA231                                                       | -0.63                   |
| Kd_pcRAF_R1R2_L1_SKBR3                                                        | 0.99                    |
| Kd_pcRAF_R1R3_L1_MDA231                                                       | -0.40                   |
| Kd_pcRAF_R1R3_L1_SKBR3                                                        | 1.35                    |
| Kd_pcRAF_R2R3_L1_MDA231                                                       | 0.00                    |
| Kd_pcRAF_R2R3_L1_SKBR3                                                        | 1.66                    |
| Kd_pcRAF_basal_L1_MDA231                                                      | -1.65                   |
| Kd_pcRAF_basal_L1_SKBR3                                                       | -0.83                   |
| build_R1R1_L1_MDA231                                                          | -2.12                   |

| Parameter name                                               | Estimated value (log10) |
|--------------------------------------------------------------|-------------------------|
| build_R1R1_L1_SKBR3                                          | 0.00                    |
| build_R1R3_L1_MDA231                                         | -3.04                   |
| build_R1R3_L1_SKBR3                                          | 3.20                    |
| degrade_R1R1_L1_MDA231                                       | 0.00                    |
| degrade_R1R1_L1_SKBR3                                        | 0.00                    |
| degrade_R1R2_L1_MDA231                                       | 0.00                    |
| degrade_R1R2_L1_SKBR3                                        | 0.00                    |
| degrade_R1R3_L1_MDA231                                       | 0.77                    |
| degrade_R1R3_L1_SKBR3                                        | 0.58                    |
| degrade_R2R3_L1_MDA231                                       | 0.00                    |
| degrade_R2R3_L1_SKBR3                                        | 0.91                    |
| dephospho_S6K_L1_MDA231                                      | 0.65                    |
| dephospho_S6K_L1_SKBR3                                       | 0.50                    |
| dephospho_pERK_L1_MDA231                                     | -0.78                   |
| dephospho_pERK_L1_SKBR3                                      | 0.00                    |
| dephospho_pMEK_L1_MDA231                                     | 0.27                    |
| dephospho_pMEK_L1_SKBR3                                      | -0.01                   |
| phospho_ERK_L1_MDA231                                        | 0.09                    |
| phospho_ERK_L1_SKBR3                                         | 0.00                    |
| phospho_MEK_L1_MDA231                                        | 0.29                    |
| phospho_MEK_L1_SKBR3                                         | 0.00                    |
| phospho_MEK_basal_L1_MDA231                                  | 0.84                    |
| phospho_MEK_basal_L1_SKBR3                                   | -0.83                   |
| phospho_S6K_AKT_L1_MDA231                                    | 0.00                    |
| phospho_S6K_AKT_L1_SKBR3                                     | 0.36                    |
| phospho_S6K_ERK_L1_MDA231                                    | 0.17                    |
| phospho_S6K_ERK_L1_SKBR3                                     | 0.00                    |
| <b>Offset and scaling parameters fitted without L1 prior</b> |                         |
| offset_pcRAF_SKBR3                                           | -0.18                   |
| offset_pAkt_SKBR3                                            | -0.46                   |
| offset_pERK_SKBR3                                            | -0.56                   |
| offset_pMEK_SKBR3                                            | -0.05                   |
| offset_pR1_SKBR3                                             | -0.16                   |
| offset_pR2_SKBR3                                             | -0.04                   |
| offset_pR3_SKBR3                                             | -0.01                   |
| offset_pPS6K_SKBR3                                           | -0.63                   |
| offset_tERK_SKBR3                                            | -0.01                   |
| offset_tMEK_SKBR3                                            | 0.00                    |
| offset_tR1_SKBR3                                             | -0.11                   |
| offset_tR2_SKBR3                                             | -0.72                   |
| offset_tR3_SKBR3                                             | -0.23                   |
| offset_tS6K_SKBR3                                            | -0.38                   |
| scale_ERK_SKBR3                                              | -0.45                   |
| scale_MEK_SKBR3                                              | -0.45                   |
| scale_R1_SKBR3                                               | 0.83                    |
| scale_R2_SKBR3                                               | -0.24                   |
| scale_R3_SKBR3                                               | 1.40                    |
| scale_S6K_SKBR3                                              | -0.42                   |
| scale_pcRAF_SKBR3                                            | 0.71                    |
| scale_pAkt_SKBR3                                             | 1.29                    |
| scale_pERK_SKBR3                                             | 3.67                    |
| scale_pMEK_SKBR3                                             | 0.05                    |
| scale_pR1_SKBR3                                              | 1.88                    |
| scale_pR2_SKBR3                                              | 1.17                    |
| scale_pR3_SKBR3                                              | -1.14                   |
| scale_pPS6K_SKBR3                                            | -0.08                   |

**Data file S1.** Viability screen of MCF7 and T47D cell lines.

## Supplementary Methods

### Model reduction

All models of complex biological systems are simplifications. However, to ensure reliable model predictions and thus provide a useful model, the model complexity should be tailored to the available information in the experimental data. Too complex models are more likely to overfit measurement errors and then provide inaccurate parameter estimates and predictions. In this project, this complexity adaptation of the ODE signaling model was realized by profile likelihood-based model reduction [2]. Therefore, the model was reduced until all parameters could be determined by a unique optimal value and finite confidence intervals, i.e. until all parameters were identifiable. In the following, the reduction of the ODE signaling model is exemplified by three major reduction steps that were performed.

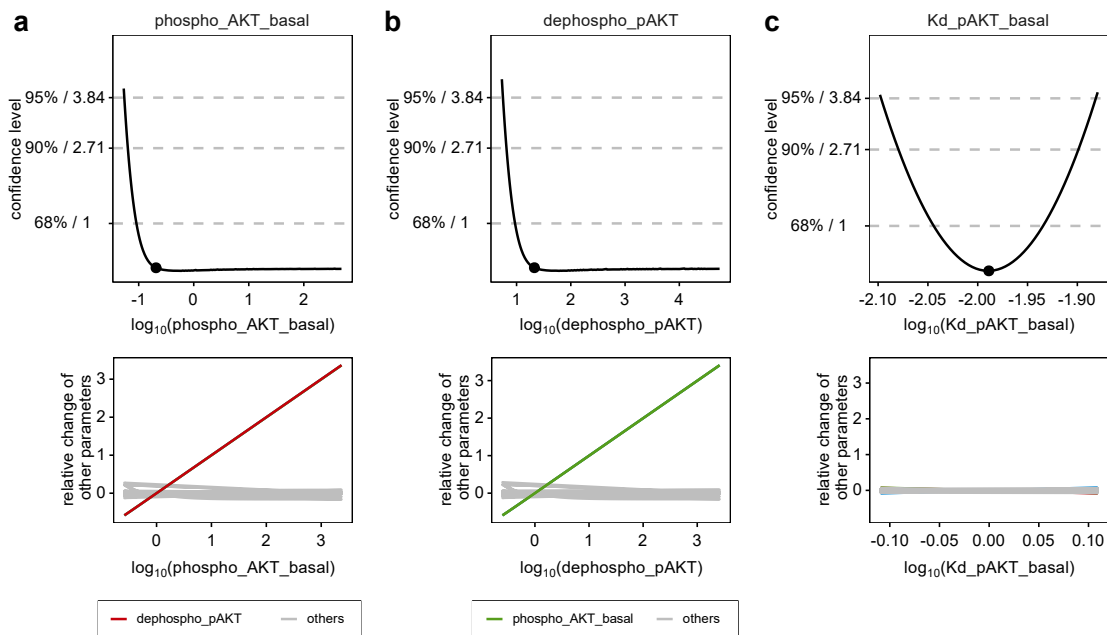

**Figure SM1.** Profile likelihood based model reduction of the AKT sub-module. The profile likelihood for (a) phospho\_AKT\_basal as well as (b) dephospho\_pAKT are practically non-identifiable. (c) After the first model reduction step, a reparametrization, the ratio parameter Kd\_pAKT\_basal becomes identifiable.

In the first instance we regard two *practical non-identifiable* parameters [3] describing the basal phosphorylation (phospho\_AKT\_basal) and the dephosphorylation of AKT (dephospho\_pAKT). As shown in Figure SM1a and b these two parameters are only bounded to lower values as the likelihood profile is flat towards large values. Obviously, the RPPA data used for the calibration of the signaling model does not provide information about the upper bound of these two parameters. However, as depicted in the lower panel of the plots, there exists a positive correlation between these two parameters. In this scenario, identifiability can be achieved by introducing the ratio parameter  $\text{Kd\_pAKT\_basal} = \left( \frac{\text{phospho\_AKT\_basal}}{\text{dephospho\_pAKT}} \right)$ . Replacing e.g. phospho\_AKT\_basal by  $\text{Kd\_pAKT\_basal} \cdot \text{dephospho\_pAKT}$ , the ratio parameter becomes identifiable and has no considerable dependencies to other parameters left (Figure SM1c). The remaining parameter dephospho\_pAKT is flat and can be fixed to an arbitrary value.

A second scenario for model reduction is represented by the dynamic parameter *degrade\_R1R2\_TGF*, a model parameter that describes the degradation of the EGFR:ERBB2 hetero-dimer after TGF stimulation. In Figure SM1a the profile likelihood of this parameter is plotted along with its dependencies. Since the profile is flat towards small values and all

parameter dependencies are flat in this direction as well, this parameter is not necessary to describe the data, i.e. the degradation of the EGFR:ERBB2 dimer after TGF stimulation is not needed. Thus, this parameter can be fixed to zero retaining a good fit to the data.

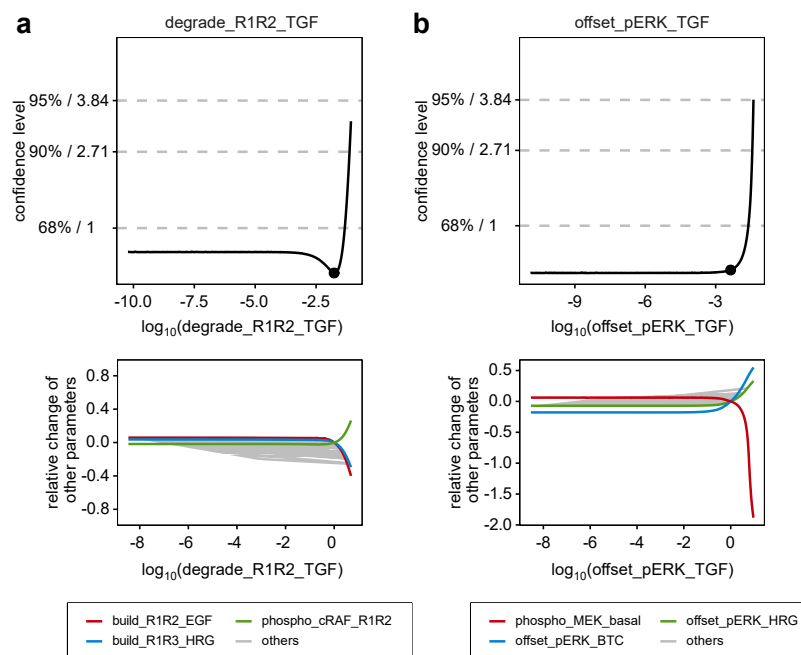

**Figure SM2.** Profile likelihood based model reduction of redundant parameters. The profile likelihood for (a) the dynamic parameter *degrade\_R1R2\_TGF* as well as (b) the observation-related parameter *offset\_pERK\_TGF* is flat towards small values, indicating that these parameters are not necessary for the data description. They can thus be fixed to zero.

Finally, the last scenario describes an observable-related model reduction step. The ODE signaling model presented in this work contains a lot of observable-related parameters as scalings and offsets in addition to dynamic parameters. Especially offset parameters are often dispensable, as most of our data is measured on relative scale. This is the case e.g. for the parameter *offset\_pERK\_TGF* that describes the offset for the observable pERK after TGF stimulation (Figure SM1b). This parameter is flat towards small values with flat dependencies and can be therefore removed, i.e. fixed to zero.

The here presented model reduction steps exemplify the reduction procedure which includes in total 63 model reduction steps. Even though a reduction step is usually dedicated to a specific parameter or parameter subset, the reduction might have an impact on other parameters. That is why the model was refitted after each reduction step and likelihood profiles were recalculated.

### L<sub>1</sub> regularization for ODE models

Signal transduction is essential for all cells and is guided through a signal transduction network shared by most cell types. Even though pathway structures are mostly identical, kinetic rates or protein concentrations might differ between cell types originating, e.g. from mutations or gene amplifications. The identification of such differences is of major importance especially for cancer cells to evaluate treatment strategies. Such cell-specific differences can be analyzed with a mathematical model by testing which model parameters have to be considered as cell type-specific and which parameters can be treated as identical. A method to efficiently determine those parameters that have to be cell type-specific is the L<sub>1</sub> regularization [4]. This method was applied in our study to determine differences between the luminal cell lines T47D and MCF7 and (i) the TNBC MDA-MB-231 as well as (ii) the HER2-positive SKBR3 cell line.



To apply  $L_1$  regularization, the ODE signaling model was reparametrized. Each dynamic model parameter  $p_2$  of the analyzed cell line MDA-MB-231 or SKBR3 was expressed in relation to the corresponding parameter  $p_1$  of the original luminal model as

$$p_2 = p_1 \cdot \Delta p \quad \text{or} \quad \log(p_2) = \log(p_1) + \log(\Delta p) \quad (1)$$

after transformation to the logarithmic scale. Here,  $\Delta p$  corresponds to the ratio between a dynamic parameter  $p_i$  in two cell lines. For  $\log(\Delta p) = 0$  the parameters for the two cell lines are identical.

The concept of  $L_1$  regularization is to add an  $L_1$  penalty to the objective function, introduced in Equation 1 of the main paper, that penalizes exactly this ratio parameter  $\Delta p$ . Thus, the  $L_1$  penalty forces the model to prefer solutions with equal parameters between the two cell lines. The new objective function yields

$$\chi^2(p, \Delta p) = \chi^2(p) + \lambda \left( \sum_i |\log(\Delta p_i)| \right) \quad (2)$$

with  $\lambda$  indicating the strength of the  $L_1$  penalty. For the analysis of our additional cell lines we gradually increased the value of  $\lambda$  from  $10^{-3}$  to  $10^3$ , performing multi-start optimization for every  $\lambda$ .

The best value for the objective function  $\chi^2(p, \Delta p)$  in Equation (2) will be achieved when  $\lambda = 0$ , as in this scenario all parameters can differ between the two cell lines, which gives the model the maximum freedom to describe the data. However, to select the best model with the optimal regularization strength  $\lambda$ , also the number of non-zero parameters has to be taken into account. Therefore, the AIC was calculated for each value of  $\lambda$  respectively and was used as selection criteria. Doing so, we could identify  $\lambda = 10^{0.67}$  as the best regularization strength for the MDA-MB-231 cells as well as  $\lambda = 10^{-0.65}$  for the SKBR3 cell line.

## References

1. Niepel, M.; Hafner, M.; Pace, E.A.; Chung, M.; Chai, D.H.; Zhou, L.; Schoeberl, B.; Sorger, P.K. Profiles of Basal and stimulated receptor signaling networks predict drug response in breast cancer lines. *Sci. Signal.* **2013**, *6*, ra84. <https://doi.org/10.1126/scisignal.2004379>.
2. Maiwald, T.; Hass, H.; Steiert, B.; Vanlier, J.; Engesser, R.; Raue, A.; Kipkeew, F.; Bock, H.H.; Kaschek, D.; Kreutz, C.; et al. Driving the Model to Its Limit: Profile Likelihood Based Model Reduction. *PLOS ONE* **2016**, *11*, e0162366. <https://doi.org/10.1371/journal.pone.0162366>.
3. Raue, A.; Kreutz, C.; Maiwald, T.; Bachmann, J.; Schilling, M.; Klingmüller, U.; Timmer, J. Structural and practical identifiability analysis of partially observed dynamical models by exploiting the profile likelihood. *Bioinformatics* **2009**, *25*, 1923–1929. <https://doi.org/10.1093/bioinformatics/btp358>.
4. Steiert, B.; Timmer, J.; Kreutz, C.  $L_1$  regularization facilitates detection of cell type-specific parameters in dynamical systems. *Bioinformatics* **2016**, *32*, i718–i726. <https://doi.org/10.1093/bioinformatics/btw461>.
